# Supplementary material for: Rhodium-catalyzed biheteroaryl-2-carbonitrile synthesis via double C–H activation
Source: Royal Society of Chemistry journal article supplement (doi:10.1039/c9qo01114e), 2019-01-01

## Supporting Information

### Rhodium-Catalyzed Biheteroaryl-2-Carbonitriles Synthesis via Double C–H Activation

Hui-Bei Xu,<sup>a</sup> Yan-Ying Zhu,<sup>a</sup> Jia-Hui Yang,<sup>a</sup> Xin-Yue Chai,<sup>a</sup> Lin Dong<sup>\*a</sup>

1. General methods
2. Optimization of the reaction conditions
3. Invalid examples
4. General procedure for synthesis of 3*H*-indole compounds
5. Mechanistic study
6. Synthetic application of 3
7. Characterization data for compounds
8. <sup>1</sup>H and <sup>13</sup>C NMR spectra.

## 1. General methods

NMR data were obtained for  $^1\text{H}$  at 400 MHz or 600 MHz, and for  $^{13}\text{C}$  at 100 MHz or 151 MHz. Chemical shifts were reported in ppm from tetramethylsilane with the solvent resonance as the internal standard in  $\text{CDCl}_3$  solution. ESI HRMS was recorded on a Waters SYNAPT G2 and Water XEVO G2 Q-ToF. UV detection was monitored at 220 nm. TLC was performed on glass-backed silica plates. Column chromatography was performed on silica gel (200-300 mesh), eluting with ethyl acetate and petroleum ether.

## 2. Screening reaction conditions

Many other conditions cannot increase the yield of **3a** (Table A).

**Table A. Additional reaction conditions<sup>a</sup>**

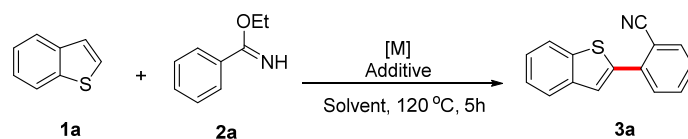

| Entry           | Cat.                                | Additive/[equiv.]              | oxidant                                            | Yield <sup>b</sup> /% |
|-----------------|-------------------------------------|--------------------------------|----------------------------------------------------|-----------------------|
| 1               | $[\text{Cp}^*\text{IrCl}_2]_2$      | $\text{AgSbF}_6$               | $\text{Ag}_2\text{O}$                              | 8%                    |
| 2               | $\text{Cp}^*\text{Co}(\text{CO})_2$ | $\text{AgSbF}_6$               | $\text{Ag}_2\text{O}$                              | N.R.                  |
| 3               | $\text{Ru}(\text{p-cymene})_2$      | $\text{AgSbF}_6$               | $\text{Ag}_2\text{O}$                              | N.R.                  |
| 4               | $[\text{Cp}^*\text{RhCl}_2]_2$      | $\text{AgSbF}_6$               | $\text{Cu}(\text{OAc})_2$                          | 14%                   |
| 5               | $[\text{Cp}^*\text{RhCl}_2]_2$      | $\text{AgSbF}_6$               | $\text{Cu}(\text{acac})_2$                         | N.R.                  |
| 6               | $[\text{Cp}^*\text{RhCl}_2]_2$      | $\text{AgSbF}_6$               | $\text{Ag}_2\text{CO}_3$                           | 9%                    |
| 7               | $[\text{Cp}^*\text{RhCl}_2]_2$      | $\text{AgSbF}_6$               | $\text{Cu}(\text{OAc})_2 \cdot \text{H}_2\text{O}$ | N.R.                  |
| 8               | $[\text{Cp}^*\text{RhCl}_2]_2$      | $\text{AgSbF}_6/\text{NaOPiv}$ | $\text{AgF}$                                       | 23%                   |
| 9               | $[\text{Cp}^*\text{RhCl}_2]_2$      | $\text{AgSbF}_6/\text{NaOPiv}$ | $\text{Ag}_2\text{CO}_3$                           | 25%                   |
| 10              | $[\text{Cp}^*\text{RhCl}_2]_2$      | $\text{AgSbF}_6/\text{HOAc}$   | $\text{Ag}_2\text{O}$                              | N.R.                  |
| 11              | $[\text{Cp}^*\text{RhCl}_2]_2$      | $\text{AgSbF}_6/\text{TsOH}$   | $\text{Ag}_2\text{O}$                              | 22%                   |
| 12              | $[\text{Cp}^*\text{RhCl}_2]_2$      | $\text{AgOAc}$                 | $\text{Ag}_2\text{O}$                              | N.R.                  |
| 13 <sup>c</sup> | $[\text{Cp}^*\text{RhCl}_2]_2$      | $\text{AgSbF}_6$               | $\text{Ag}_2\text{O}$                              | N.R.                  |
| 14 <sup>d</sup> | $[\text{Cp}^*\text{RhCl}_2]_2$      | $\text{AgSbF}_6$               | $\text{Ag}_2\text{O}$                              | N.R.                  |
| 15              | $[\text{Cp}^*\text{RhCl}_2]_2$      | --                             | $\text{Ag}_2\text{O}$                              | 43%                   |

<sup>a</sup> Reaction conditions unless otherwise specified: **1a** (0.1 mmol), **2a** (0.12 mmol), 5 mol% of catalyst, silver salts (30% mol), and oxidant (0.21 mmol) in DCE (0.5 mL) at 120 °C under Air for 5 h. 1-AdCOOH is the abbreviation of 1-adamantanecarboxylic acid. <sup>b</sup> Isolated yield. <sup>c</sup> 0.25 ml of DMF. <sup>d</sup> 0.25 ml of toluene.

## 3. Invalid examples

However, other heterocycles such as benzimidazole, benzoxazole, benzothiazole and N-methyl indole could not be tolerated under the optimized reaction conditions. In addition, ethyl thiophene-2-carboxylate or ethyl furan-2-carboxylate were not suitable substrates, probably due to the electronic effects (Scheme A).

**Scheme A. Invalid substrates in the cascade reaction.**

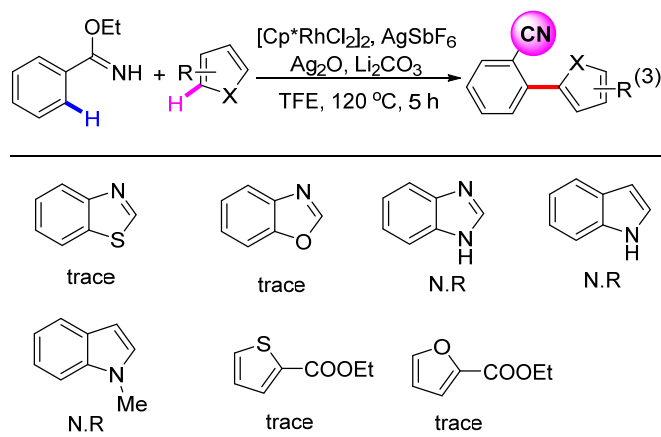

Scheme A

#### 4. General procedure for synthesis of biheteroaryl-2-carbonitrile compounds

benzothiophene **1** (0.1 mmol), benzimidate **2** (0.12 mmol),  $[\text{Cp}^*\text{RhCl}_2]_2$  (3 mg, 5 mol%),  $\text{AgSbF}_6$  (5.2 mg, 30 mol%),  $\text{Ag}_2\text{O}$  (48.7 mg, 0.21 equiv.) and  $\text{Li}_2\text{CO}_3$  (7.4 mg, 1 equiv.) were stirred in TFE (0.5 mL) under an air atmosphere at 120 °C for 1.5 h, then additional 0.1 mmol of **2** was added for 5 h. After completion, the reaction mixture was purified by flash chromatography eluting with ethyl acetate and petroleum ether (1:30) to give the product **3** and **4** as an off-white solid.

#### 5. Mechanistic study

##### (1) Detection of the intermediate **III**

Benzothiophene **1a** (0.1 mmol), benzimidate **2a** (0.12 mmol),  $[\text{Cp}^*\text{RhCl}_2]_2$  (3 mg, 5 mol%),  $\text{AgSbF}_6$  (5.2 mg, 30 mol%),  $\text{Ag}_2\text{O}$  (48.7 mg, 0.21 equiv.) and  $\text{Li}_2\text{CO}_3$  (7.4 mg, 1 equiv.) were stirred in TFE (0.5 mL) under an air atmosphere at 120 °C for 0.5 h. Then the reaction mixture was cooled to room temperature and analyzed by LC-MS without purification. The mass spectrum was obtained as below. LC-MS (ESI+): calculated for **III**  $m/z$   $[\text{III} + \text{H}]^+$  ( $\text{C}_{17}\text{H}_{16}\text{NOS}$ ):282.1, found: 282.1

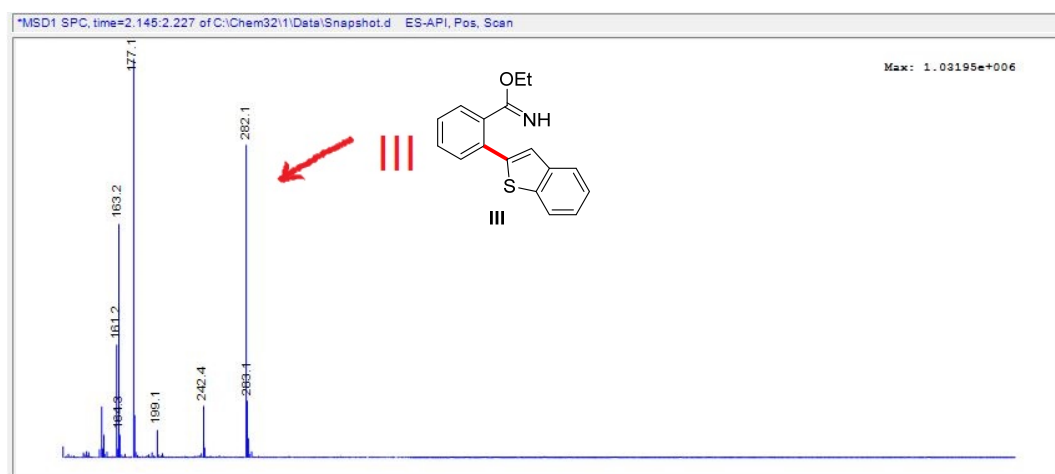

##### (2) Kinetic isotope experiments

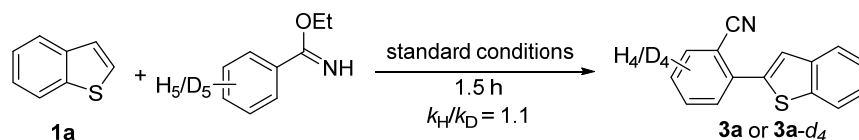

To a flask charged with benzothiophene **1a** (0.1 mmol), benzimidate **2a** or **2a-d<sub>5</sub>** (0.12 mmol), [Cp\**RhCl*<sub>2</sub>]<sub>2</sub> (3 mg, 5 mol%), AgSbF<sub>6</sub> (5.2 mg, 30 mol%), Ag<sub>2</sub>O (48.7 mg, 0.21 equiv.) and Li<sub>2</sub>CO<sub>3</sub> (7.4 mg, 1 equiv.) were stirred in TFE (0.5 mL). The reaction mixture was stirred at 120 °C for 1.5 h under air atmosphere. After cooled to room temperature, the reaction mixture was purified by flash chromatography eluting with ethyl acetate and petroleum ether (1:20) to give the desired product 7.6 mg of **3a** and 6.9 mg of **3a-d<sub>4</sub>**. The KIE value of  $k_H/k_D = 1.1$  was determined based on the product yield of **3a** and **3a-d<sub>4</sub>**.

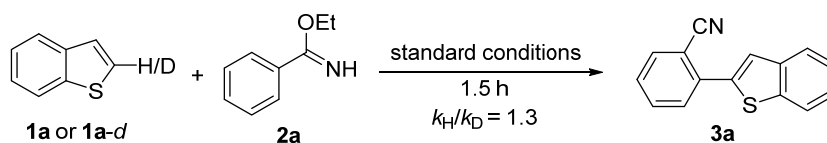

To a flask charged with benzothiophene **1a** or **1a-d** (0.1 mmol), benzimidate **2a** (0.12 mmol), [Cp\**RhCl*<sub>2</sub>]<sub>2</sub> (3 mg, 5 mol%), AgSbF<sub>6</sub> (5.2 mg, 30 mol%), Ag<sub>2</sub>O (48.7 mg, 0.21 equiv.) and Li<sub>2</sub>CO<sub>3</sub> (7.4 mg, 1 equiv.) were stirred in TFE (0.5 mL). The reaction mixture was stirred at 120 °C for 1.5 h under air atmosphere. After cooled to room temperature, the reaction mixture was purified by flash chromatography eluting with ethyl acetate and petroleum ether (1:20) to give the desired product 7.6 mg of **3a** and 6 mg of **3a** (from **1a-d**). The KIE value of  $k_H/k_D = 1.3$  was determined based on the product yield of **3a**.

## 6. Synthetic application of 3

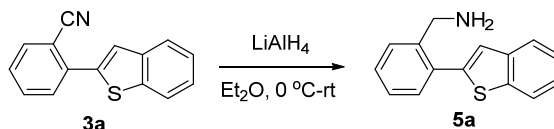

To a solution of 2-(benzo[*b*]thiophen-2-yl)benzonitrile **3a** (0.1 mmol, 23.5 mg) in Et<sub>2</sub>O (0.5 mL) was added dropwise LiAlH<sub>4</sub> (0.4 mmol, 15.2 mg in 0.3 mL Et<sub>2</sub>O) at 0 °C and stirred for 0.5 h. 4 M NaOH was added slowly to until a clear solution was obtained. The Et<sub>2</sub>O layer was separated and the aqueous phase was extracted with Et<sub>2</sub>O (5 mL, 3 times). Combined the organic layers and dried over Na<sub>2</sub>SO<sub>4</sub>. After removing the solvent under reduced pressure, the residue was purified by column chromatography on silica gel with EtOAc. The product **5a** was obtained in 60% isolated yield as an off-white solid.

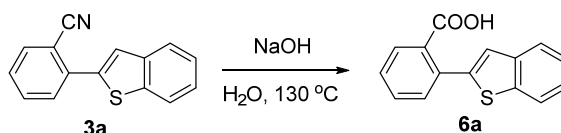

To a solution of 2-(benzo[*b*]thiophen-2-yl)benzonitrile **3a** (0.1 mmol, 23.5 mg) in ethylene glycol (2.5 mL) was added sodium hydroxide solution (120 mg NaOH in 2 mL water) and stirred at 130 °C to reflux overnight. After completion of the reaction, the mixture was cooled down to room temperature and extracted with DCM (5 mL, 3 times). Combined the organic layers and

dried over Na<sub>2</sub>SO<sub>4</sub>. After removing the solvent under reduced pressure, the residue was purified by column chromatography on silica gel with EtOAc. The product **6a** was obtained in 82% isolated yield as white solid.

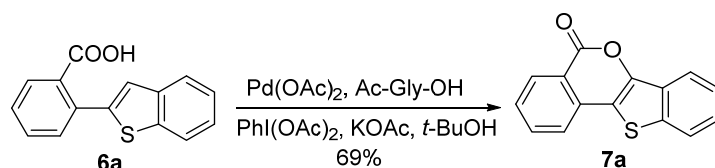

A flame-dried Schlenk tube with a magnetic stir bar was charged with *ortho*-carboxyl bi(hetero)arene **6a** (0.1 mmol), Pd(OAc)<sub>2</sub> (10.0 mol%), Ac-Gly-OH (20 mol %), PhI(OAc)<sub>2</sub> (2.0 equiv), KOAc (2.0 equiv) and *t*-BuOH (1 mL). The resulting mixture was heated at 120 °C for 24 h. After completion, the reaction mixture was purified by column chromatography on silica gel to provide the desired product **7a**.

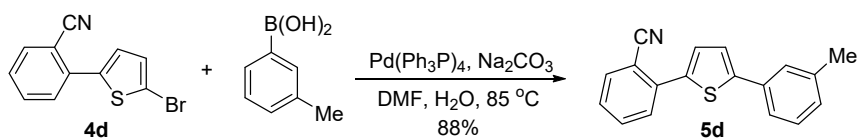

A flame-dried Schlenk tube with a magnetic stir bar was charged with 2-(5-bromothiophen-2-yl)benzonitrile **4d** (0.1 mmol), DMF (1 mL), 1M aqueous solution of sodium carbonate (0.25 mL) and boronic acid (1.1 mmol). The mixture was degassed with a steady stream of argon for 10min at room temperature. To this mixture, Pd(Ph<sub>3</sub>P)<sub>4</sub> (0.1mmol) was added and the mixture was degassed with argon for 2 min after which it was heated under argon to 85 °C for 3 h. After completion of the reaction, the mixture was extracted with EA (5 mL, 3 times). Combined the organic layers and dried over Na<sub>2</sub>SO<sub>4</sub>. After removing the solvent under reduced pressure, the residue was purified by column chromatography on silica gel. The product **5d** was obtained in 88% isolated yield as yellow oil.

## 7. Characterization data for compounds

### 2-(benzo[b]thiophen-2-yl)benzonitrile (**3a**)

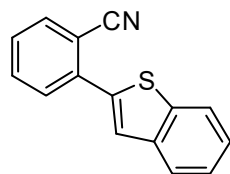

19.7 mg (84%); off-white solid; mp = 109.3-113.1 °C; <sup>1</sup>H NMR (400 MHz, CDCl<sub>3</sub>) δ 7.89 (s, 1H), 7.88 – 7.84 (m, 2H), 7.78 (dd, *J* = 7.8, 1.3 Hz, 1H), 7.71 (dd, *J* = 7.9, 1.2 Hz, 1H), 7.64 (td, *J* = 7.7, 1.4 Hz, 1H), 7.46 – 7.42 (m, 1H), 7.42 – 7.37 (m, 2H); <sup>13</sup>C NMR (100 MHz, CDCl<sub>3</sub>) δ 140.2, 140.1, 139.1, 137.5, 134.4, 133.0, 130.2, 128.1, 125.2, 124.8, 124.5, 124.4, 122.1, 118.7, 110.4; HRMS (EI) *m/z* [M + Na]<sup>+</sup> calculated for C<sub>15</sub>H<sub>9</sub>NNaS: 258.0353, found 258.0358.

### 2-(benzo[b]thiophen-2-yl)-4-methylbenzonitrile (**3b**)

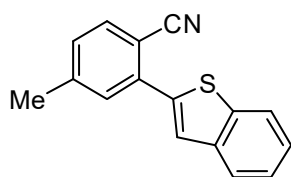

15.7 mg (63%); off-white solid; mp = 132.9-136.4 °C; <sup>1</sup>H NMR (400 MHz, CDCl<sub>3</sub>) δ 7.90 – 7.80 (m, 3H), 7.62 – 7.57 (m, 2H), 7.47 – 7.33 (m, 3H), 2.43 (s, 3H); <sup>13</sup>C NMR (100 MHz, CDCl<sub>3</sub>) δ 140.3, 140.0, 139.3, 138.6, 134.7, 134.7, 133.9, 130.1, 125.1, 124.7, 124.4, 123.9, 122.1, 118.8, 110.2, 20.8; HRMS (EI) *m/z* [M + Na]<sup>+</sup> calculated for C<sub>16</sub>H<sub>11</sub>NNaS: 272.0510, found 272.0504.

### 2-(benzo[b]thiophen-2-yl)-4-methoxybenzonitrile (3c)

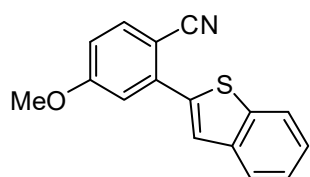

24.4 mg (92%); off-white solid; mp = 127.3-131.8 °C; <sup>1</sup>H NMR (400 MHz, CDCl<sub>3</sub>) δ 7.90 – 7.83 (m, 3H), 7.70 (d, *J* = 8.7 Hz, 1H), 7.43 – 7.35 (m, 2H), 7.18 (d, *J* = 2.5 Hz, 1H), 6.94 (dd, *J* = 8.7, 2.5 Hz, 1H), 3.91 (s, 3H); <sup>13</sup>C NMR (100 MHz, CDCl<sub>3</sub>) δ 162.8, 140.2, 140.1, 139.4, 139.1, 136.2, 125.3, 124.8, 124.5, 124.5, 122.1, 119.1, 115.7, 114.0, 102.4, 55.7; HRMS (EI) *m/z* [M + Na]<sup>+</sup> calculated for C<sub>16</sub>H<sub>11</sub>NNaOS: 288.0459, found 288.0459.

### 2-(benzo[b]thiophen-2-yl)-4-fluorobenzonitrile (3d)

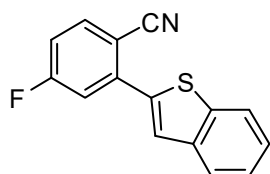

14.4 mg (57%); off-white solid; mp = 120.5-123.1 °C; <sup>1</sup>H NMR (400 MHz, CDCl<sub>3</sub>) δ 7.90 – 7.80 (m, 3H), 7.62 – 7.57 (m, 2H), 7.47 – 7.33 (m, 3H), 2.43 (s, 3H); <sup>13</sup>C NMR (100 MHz, CDCl<sub>3</sub>) δ 164.7 (d, *J* = 256Hz), 140.5 (d, *J* = 10Hz), 140.1, 140.0, 137.7 (d, *J* = 2Hz), 136.8 (d, *J* = 9Hz), 125.7, 125.1, 125.0, 124.7, 122.2, 118.1, 115.2 (d, *J* = 20Hz), 106.6, 99.9 (d, *J* = 17Hz); HRMS (EI) *m/z* [M + Na]<sup>+</sup> calculated for C<sub>15</sub>H<sub>8</sub>FNNaS: 276.0259, found 276.0258.

### 2-(benzo[b]thiophen-2-yl)-4-chlorobenzonitrile (3e)

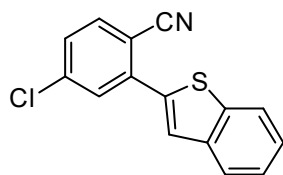

21.5 mg (80%); off-white solid; mp = 122.0-127.4 °C; <sup>1</sup>H NMR (400 MHz, CDCl<sub>3</sub>) δ 7.91 (s, 1H), 7.89 – 7.85 (m, 2H), 7.73 – 7.69 (m, 2H), 7.44 – 7.39 (m, 3H); <sup>13</sup>C NMR (100 MHz, CDCl<sub>3</sub>) δ 140.2, 140.0, 139.6, 139.2, 137.6, 135.5, 130.3, 128.4, 125.7, 125.2, 125.0, 124.7, 122.2, 118.0, 108.8; HRMS (EI) *m/z* [M + Na]<sup>+</sup> calculated for C<sub>15</sub>H<sub>8</sub>ClNNaS: 291.9964, found 291.9965.

### 2-(benzo[b]thiophen-2-yl)-4-bromobenzonitrile (3f)

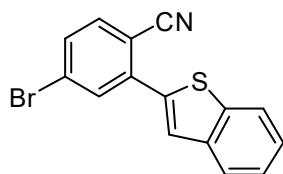

25.3 mg (81%); off-white solid; mp = 146.1-154.0 °C; <sup>1</sup>H NMR (400 MHz, CDCl<sub>3</sub>) δ 7.92 – 7.84 (m, 4H), 7.63 (d, *J* = 8.3 Hz, 1H), 7.58 (dd, *J* = 8.3, 1.8 Hz, 1H), 7.45 – 7.38 (m, 2H); <sup>13</sup>C NMR (100 MHz, CDCl<sub>3</sub>) δ 140.2, 140.0, 139.2, 137.5, 135.4, 133.2, 131.3, 128.1, 125.7, 125.2, 125.0, 124.7, 122.2, 118.1, 109.3; HRMS (EI) *m/z* [M + Na]<sup>+</sup> calculated for C<sub>15</sub>H<sub>8</sub>BrNNaS: 335.9459, found 335.9457.

### 2-(benzo[b]thiophen-2-yl)-4-(trifluoromethyl)benzonitrile (3g)

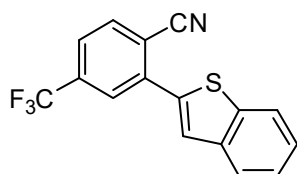

19.1 mg (63%); off-white solid; mp = 84.9-93.3 °C; <sup>1</sup>H NMR (400 MHz, CDCl<sub>3</sub>) δ 7.96 (s, 1H), 7.94 (d, *J* = 2.4 Hz, 1H), 7.93 – 7.87 (m, 3H), 7.70 (dd, *J* = 8.2, 1.6 Hz, 1H), 7.45 – 7.40 (m, 2H); <sup>13</sup>C NMR (100 MHz, CDCl<sub>3</sub>) δ 140.4, 140.0, 138.6, 137.4, 135.1, 134.9 (d, *J* = 33Hz), 127.0 (q, *J* = 3Hz), 125.8, 125.5, 125.1, 124.8, 124.7 (q, *J* = 3Hz), 122.9 (q, *J* = 270Hz), 122.3, 117.5, 113.8; HRMS (EI) *m/z* [M + Na]<sup>+</sup> calculated for C<sub>16</sub>H<sub>8</sub>F<sub>3</sub>NNaS: 326.0227, found 326.0228.

### methyl 3-(benzo[b]thiophen-2-yl)-4-cyanobenzoate (3h)

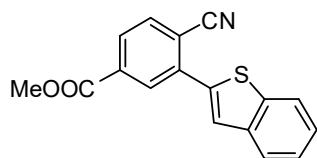

14.1 mg (48%); off-white solid; mp = 151.5-155.8 °C; <sup>1</sup>H NMR (400 MHz, CDCl<sub>3</sub>) δ 8.37 (d, *J* = 1.7 Hz, 1H), 8.07 (dd, *J* = 8.1, 1.6 Hz, 1H), 7.93 (s, 1H), 7.91 – 7.85 (m, 3H), 7.44 – 7.39 (m, 2H), 3.99 (s, 3H); <sup>13</sup>C NMR (101 MHz, CDCl<sub>3</sub>) δ 165.2, 140.3, 140.1, 137.9, 134.6, 134.2, 131.0, 128.7, 125.6, 125.0, 125.0, 124.7, 122.2, 118.0, 114.1, 52.9; HRMS (EI) *m/z* [M + Na]<sup>+</sup> calculated for C<sub>17</sub>H<sub>11</sub>NNaO<sub>2</sub>S: 316.0408, found 316.0410.

### 2-(benzo[b]thiophen-2-yl)-6-fluorobenzonitrile (3i)

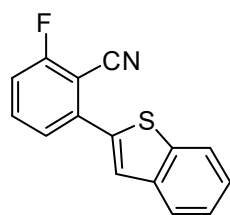

11.9 mg (47%); off-white solid; mp = 118.0-124.0 °C; <sup>1</sup>H NMR (400 MHz, CDCl<sub>3</sub>) δ 7.94 (s, 1H), 7.88 (dt, *J* = 9.6, 3.4 Hz, 2H), 7.63 (td, *J* = 8.1, 5.7 Hz, 1H), 7.52 (d, *J* = 7.9 Hz, 1H), 7.42 (q, *J* = 5.0, 4.4 Hz, 2H), 7.21 (t, *J* = 8.5 Hz, 1H); <sup>13</sup>C NMR (100 MHz, CDCl<sub>3</sub>) δ 164.6 (d, *J* = 258 Hz), 140.2, 140.1, 139.3, 137.9 (d, *J* = 2 Hz), 134.5 (d, *J* = 9 Hz), 125.7, 125.7, 125.1, 125.0, 124.7, 122.1, 115.2 (d, *J* = 20 Hz), 113.5, 99.9 (d, *J* = 17 Hz); HRMS (EI) *m/z* [M + Na]<sup>+</sup> calculated for C<sub>15</sub>H<sub>8</sub>FNNaS: 276.0259, found 276.0258.

### 2-(benzo[b]thiophen-2-yl)-6-chlorobenzonitrile (3j)

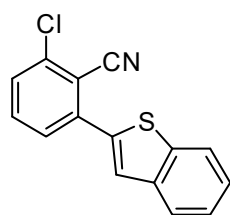

19.1 mg (71%); off-white solid; mp = 149.5-158.5 °C; <sup>1</sup>H NMR (400 MHz, CDCl<sub>3</sub>) δ 7.90 (s, 1H), 7.89 – 7.85 (m, 2H), 7.61 (dd, *J* = 7.7, 1.5 Hz, 1H), 7.57 (t, *J* = 7.8 Hz, 1H), 7.51 (dd, *J* = 7.8, 1.5 Hz, 1H), 7.44 – 7.38 (m, 2H); <sup>13</sup>C NMR (100 MHz, CDCl<sub>3</sub>) δ 140.2, 140.0, 139.9, 138.9, 138.1, 133.4, 129.0, 128.4, 125.6, 125.2, 125.0, 124.7, 122.1, 115.6, 111.4; HRMS (EI) *m/z* [M + Na]<sup>+</sup> calculated for C<sub>15</sub>H<sub>8</sub>ClNNaS: 291.9964, found 291.9966

### 2-(benzo[b]thiophen-2-yl)-6-methylbenzonitrile (3k)

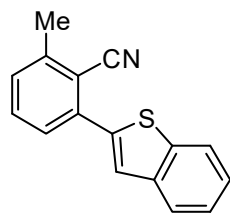

13.7 mg (55%); off-white solid; mp = 123.4-127.2 °C; <sup>1</sup>H NMR (400 MHz, CDCl<sub>3</sub>) δ 7.90 – 7.81 (m, 3H), 7.56 – 7.49 (m, 2H), 7.43 – 7.35 (m, 2H), 7.32 (t, *J* = 4.4 Hz, 1H), 2.65 (s, 3H); <sup>13</sup>C NMR (100 MHz, CDCl<sub>3</sub>) δ 143.8, 140.2, 140.2, 139.6, 137.9, 132.4, 129.6, 127.7, 125.1, 124.7, 124.4, 124.4, 122.1, 117.5, 111.2, 21.2; HRMS (EI) *m/z* [M + Na]<sup>+</sup> calculated for C<sub>16</sub>H<sub>11</sub>NNaS: 272.0510, found 272.0507.

### 2-(benzo[b]thiophen-2-yl)-5-methylbenzonitrile (3l)

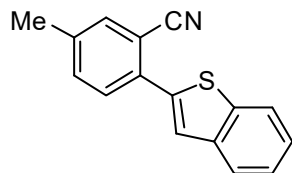

11.7 mg (47%); off-white solid; mp = 48.2-56.2 °C; <sup>1</sup>H NMR (400 MHz, CDCl<sub>3</sub>) δ 7.86 (d, *J* = 9.3 Hz, 4H), 7.52 (d, *J* = 4.8 Hz, 2H), 7.43 – 7.35 (m, 4H), 7.34 – 7.29 (m, 1H), 2.65 (s, 3H); <sup>13</sup>C NMR (100 MHz, CDCl<sub>3</sub>) δ 144.04, 140.23, 140.06, 139.32, 137.32, 134.38, 130.89, 129.03, 125.19, 124.78, 124.46, 124.30, 122.10, 118.97, 107.53, 21.83; HRMS (EI) *m/z* [M + Na]<sup>+</sup> calculated for C<sub>16</sub>H<sub>11</sub>NNaS: 272.0510, found 272.0504.

### 2-(benzo[b]thiophen-2-yl)-5-chlorobenzonitrile (3m)

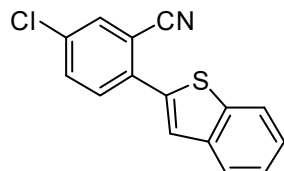

13.7 mg (51%); off-white solid; mp = 151.4-155.7 °C; <sup>1</sup>H NMR (400 MHz, CDCl<sub>3</sub>) δ 7.89 – 7.85 (m, 3H), 7.76 (d, *J* = 2.1 Hz, 1H), 7.65 (d, *J* = 8.4 Hz, 1H), 7.61 (dd, *J* = 8.5, 2.1 Hz, 1H), 7.42 – 7.38 (m, 2H);

$^{13}\text{C}$  NMR (100 MHz,  $\text{CDCl}_3$ )  $\delta$  140.2, 140.1, 137.9, 136.1, 134.2, 133.9, 133.4, 131.4, 125.5, 125.0, 124.8, 124.6, 122.1, 117.4, 111.8; HRMS (EI)  $m/z$   $[\text{M} + \text{Na}]^+$  calculated for  $\text{C}_{15}\text{H}_8\text{ClNNaS}$ : 291.9964, found 291.9965.

### 6-(benzo[b]thiophen-2-yl)benzo[d][1,3]dioxole-5-carbonitrile (3n)

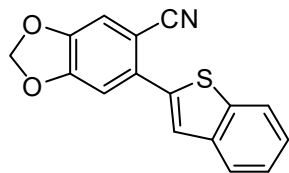

17.9 mg (64%); off-white solid; mp = 103.8-106.5 °C;  $^1\text{H}$  NMR (400 MHz,  $\text{CDCl}_3$ )  $\delta$  7.91 (s, 1H), 7.90 – 7.84 (m, 2H), 7.43 – 7.34 (m, 3H), 6.87 (d,  $J$  = 8.1 Hz, 1H), 6.18 (s, 2H);  $^{13}\text{C}$  NMR (100 MHz,  $\text{CDCl}_3$ )  $\delta$  151.4, 145.7, 140.4, 139.2, 132.8, 130.6, 126.0, 125.3, 124.6, 124.4, 122.1, 119.1, 118.8, 108.3, 104.1, 102.4; HRMS (EI)  $m/z$   $[\text{M} + \text{Na}]^+$  calculated for  $\text{C}_{16}\text{H}_9\text{NNaO}_2\text{S}$ : 302.0252, found 302.0254.

### 3-(benzo[b]thiophen-2-yl)-2-naphthonitrile (3o)

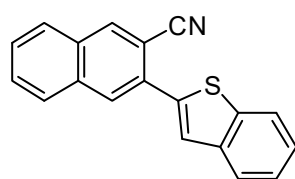

21.4 mg (75%); off-white solid; mp = 172.0-175.7 °C;  $^1\text{H}$  NMR (400 MHz,  $\text{CDCl}_3$ )  $\delta$  8.38 (s, 1H), 8.14 (s, 1H), 7.95 – 7.86 (m, 5H), 7.65 (ddd,  $J$  = 15.2, 14.1, 7.2 Hz, 2H), 7.44 – 7.37 (m, 2H);  $^{13}\text{C}$  NMR (101 MHz,  $\text{CDCl}_3$ )  $\delta$  140.4, 140.0, 139.4, 136.8, 134.6, 131.7, 131.4, 129.8, 129.7, 128.3, 128.1, 128.0, 125.1, 124.8, 124.4, 124.3, 122.1, 118.9, 108.6; HRMS (EI)  $m/z$   $[\text{M} + \text{Na}]^+$  calculated for  $\text{C}_{19}\text{H}_{11}\text{NNaS}$ : 308.0510, found 308.0519.

### 3-(benzo[b]thiophen-2-yl)thiophene-2-carbonitrile (3p)

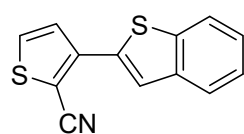

8.4 mg (35%); off-white solid; mp = 90.3-96.0 °C;  $^1\text{H}$  NMR (400 MHz,  $\text{CDCl}_3$ )  $\delta$  7.93 (s, 1H), 7.84 (dt,  $J$  = 7.0, 2.3 Hz, 2H), 7.59 (d,  $J$  = 5.2 Hz, 1H), 7.39 (td,  $J$  = 5.2, 2.3 Hz, 3H);  $^{13}\text{C}$  NMR (100 MHz,  $\text{CDCl}_3$ )  $\delta$  143.8, 139.9, 139.7, 134.8, 132.2, 127.9, 125.6, 125.0, 124.5, 123.7, 122.2, 114.7, 103.7; HRMS (EI)  $m/z$   $[\text{M} + \text{Na}]^+$  calculated for  $\text{C}_{13}\text{H}_7\text{NNaS}_2$ : 263.9918, found 263.9916.

### 2-(5-methylthiophen-2-yl)benzonitrile (4a)

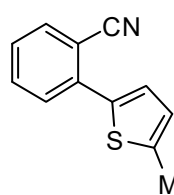

10.9 mg (55%); off-white solid; mp = 115.7-124.4 °C;  $^1\text{H}$  NMR (400 MHz,  $\text{CDCl}_3$ )  $\delta$  7.70 (dt,  $J$  = 7.7, 1.0 Hz, 1H), 7.59 – 7.54 (m, 2H), 7.45 (d,  $J$  = 3.6 Hz, 1H), 7.33 (ddd,  $J$  = 7.7, 5.4, 3.4 Hz, 1H), 6.81 (dq,  $J$  = 3.5, 1.1 Hz, 1H), 2.54 (d,  $J$  = 1.1 Hz, 3H);  $^{13}\text{C}$  NMR (100 MHz,  $\text{CDCl}_3$ )  $\delta$  142.4, 137.9, 137.0, 134.3, 132.9, 129.3, 127.7, 127.0, 126.6, 119.0, 109.5, 15.4; HRMS (EI)  $m/z$   $[\text{M} + \text{Na}]^+$  calculated for  $\text{C}_{12}\text{H}_9\text{NNaS}$ : 222.0353, found 222.0355.

### 2-(5-chlorothiophen-2-yl)benzonitrile (4b)

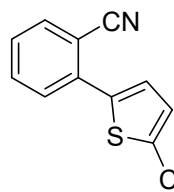

10.5 mg (48%); off-white solid; mp = 102.1-109.5 °C;  $^1\text{H}$  NMR (400 MHz,  $\text{CDCl}_3$ )  $\delta$  7.74 (dd,  $J$  = 7.8, 1.4 Hz, 1H), 7.60 (td,  $J$  = 7.7, 1.4 Hz, 1H), 7.53 (dd,  $J$  = 8.1, 1.2 Hz, 1H), 7.44 – 7.37 (m, 2H), 6.98 (d,  $J$  = 4.0 Hz, 1H);  $^{13}\text{C}$  NMR (100 MHz,  $\text{CDCl}_3$ )  $\delta$  137.8, 136.7, 134.4, 133.1, 132.1, 129.4, 127.9, 127.4, 127.1, 118.5, 110.0; HRMS (EI)  $m/z$   $[\text{M} + \text{Na}]^+$   $\text{C}_{11}\text{H}_6\text{ClNNaS}$ : 241.9807, found 241.9827.

### 2-(5-bromothiophen-2-yl)benzonitrile (4c)



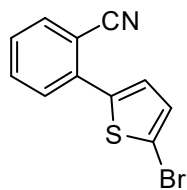

10.5 mg (40%); off-white solid; mp = 172.0-175.7 °C; <sup>1</sup>H NMR (400 MHz, CDCl<sub>3</sub>) δ 7.74 (dd, *J* = 7.8, 0.8 Hz, 1H), 7.60 (td, *J* = 7.9, 1.3 Hz, 1H), 7.56 – 7.51 (m, 1H), 7.40 (ddd, *J* = 7.1, 6.7, 2.6 Hz, 2H), 7.12 (d, *J* = 3.9 Hz, 1H); <sup>13</sup>C NMR (100 MHz, CDCl<sub>3</sub>) δ 140.4, 135.6, 134.5, 133.3, 123.0, 129.3, 128.7, 118.1, 115.0, 113.2, 110.; HRMS (EI) *m/z* [M + Na]<sup>+</sup> calculated for C<sub>11</sub>H<sub>6</sub>BrNNaS:285.9302, found 285.9302.

#### 2-(5-phenylthiophen-2-yl)benzonitrile (4d)

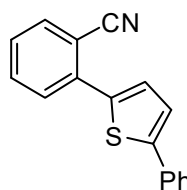

18.0 mg (69%); off-white solid; mp = 111.0-120.8 °C; <sup>1</sup>H NMR (400 MHz, CDCl<sub>3</sub>) δ 7.75 (dd, *J* = 7.8, 0.9 Hz, 1H), 7.69 – 7.63 (m, 4H), 7.61 (td, *J* = 7.7, 1.4 Hz, 1H), 7.44 – 7.37 (m, 3H), 7.37 – 7.30 (m, 2H); <sup>13</sup>C NMR (100 MHz, CDCl<sub>3</sub>) δ 146.4, 138.5, 137.4, 134.4, 133.7, 133.0, 129.3, 129.0, 128.6, 128.1, 127.5, 126.0, 124.2, 118.9, 109.7; HRMS (EI) *m/z* [M + Na]<sup>+</sup> calculated for C<sub>17</sub>H<sub>11</sub>NNaS:284.0510, found 284.0510.

#### 2-(4,5-dibromothiophen-2-yl)benzonitrile (4e)

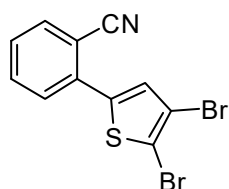

13.6 mg (40%); off-white solid; mp = 155.3-159.9 °C; <sup>1</sup>H NMR (400 MHz, CDCl<sub>3</sub>) δ 7.76 (d, *J* = 7.7 Hz, 1H), 7.63 (t, *J* = 7.7 Hz, 1H), 7.53 (d, *J* = 7.9 Hz, 1H), 7.46 (t, *J* = 7.6 Hz, 1H), 7.40 (s, 1H); <sup>13</sup>C NMR (100 MHz, CDCl<sub>3</sub>) δ 140.4, 135.6, 134.5, 133.3, 130.0, 129.0, 128.7, 118.1, 115.0, 113.2, 110.1; HRMS (EI) *m/z* [M + Na]<sup>+</sup> calculated for C<sub>11</sub>H<sub>5</sub>Br<sub>2</sub>NNaS: 363.8407, found 363.8403.

#### 2-(5-bromo-4-methylthiophen-2-yl)benzonitrile (4f)

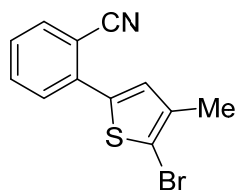

14.1 mg (51%); off-white solid; mp = 114.2-121.5 °C; <sup>1</sup>H NMR (400 MHz, CDCl<sub>3</sub>) δ 7.72 (d, *J* = 7.7 Hz, 1H), 7.62 – 7.55 (m, 1H), 7.52 (d, *J* = 7.8 Hz, 1H), 7.39 (td, *J* = 7.7, 1.1 Hz, 1H), 7.32 (s, 1H), 2.25 (s, 3H); <sup>13</sup>C NMR (100 MHz, CDCl<sub>3</sub>) δ 138.6, 138.6, 136.8, 134.4, 133.1, 129.4, 129.2, 127.8, 118.6, 111.7, 109.6, 15.4; HRMS (EI) *m/z* [M + Na]<sup>+</sup> C<sub>12</sub>H<sub>8</sub>BrNNaS: 299.9459, found 299.9456

#### 2-(3-bromobenzo[b]thiophen-2-yl)benzonitrile (4g)

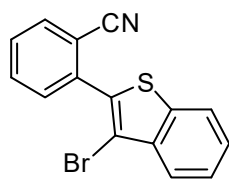

18.2 mg (58%); off-white solid; mp = 155.9-162.3 °C; <sup>1</sup>H NMR (400 MHz, CDCl<sub>3</sub>) δ 7.93 – 7.88 (m, 1H), 7.87 – 7.81 (m, 2H), 7.71 (td, *J* = 7.7, 1.3 Hz, 1H), 7.63 (dd, *J* = 7.7, 0.8 Hz, 1H), 7.60 – 7.44 (m, 3H); <sup>13</sup>C NMR (100 MHz, CDCl<sub>3</sub>) δ 138.6, 138.1, 136.7, 133.7, 133.5, 132.6, 132.0, 129.4, 126.2, 125.6, 124.1, 122.3, 117.5, 114.0, 109.1; HRMS (EI) *m/z* [M + Na]<sup>+</sup> calculated for C<sub>15</sub>H<sub>8</sub>BrNNaS:335.9459, found 335.9460.

#### 2-(benzofuran-2-yl)benzonitrile (4h)

7.0 mg (32%); off-white solid; mp = 75.0-83.4 °C; <sup>1</sup>H NMR (400 MHz, CDCl<sub>3</sub>) δ 8.12 (d, *J* = 8.1 Hz, 1H), 7.77 (d, *J* = 7.7 Hz, 1H), 7.72 (s, 1H), 7.70 – 7.64 (m, 2H), 7.55 (d, *J* = 8.2 Hz, 1H), 7.43 (t, *J* = 7.6 Hz, 1H), 7.36 (t, *J* = 7.7 Hz, 1H), 7.29 (d, *J* = 7.4 Hz, 1H); <sup>13</sup>C NMR (100 MHz, CDCl<sub>3</sub>)

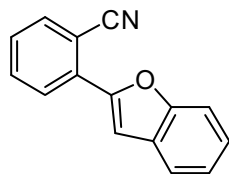

$\delta$  154.7, 151.2, 134.4, 133.0, 133.0, 128.8, 128.2, 127.1, 125.7, 123.4, 122.0, 118.8, 111.3, 108.1, 106.8; HRMS (EI)  $m/z$   $[M + Na]^+$  calculated for  $C_{15}H_9NNaO$ :242.0582, found 242.0581.

**(2-(benzo[b]thiophen-2-yl)phenyl)methanamine (5a)**

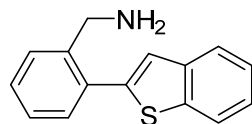

14.3 mg (60%); white solid;  $^1H$  NMR (400 MHz,  $CDCl_3$ )  $\delta$  7.86 – 7.82 (m, 1H), 7.79 (dd,  $J = 7.2, 1.6$  Hz, 1H), 7.51 (dd,  $J = 7.5, 1.4$  Hz, 1H), 7.47 (dd,  $J = 7.5, 1.6$  Hz, 1H), 7.37 (ddtt,  $J = 14.7, 7.3, 3.8, 2.0$  Hz, 4H), 7.29 (s, 1H), 4.89 (s, 2H), 4.07 (s, 2H);  $^{13}C$  NMR (100 MHz,  $CDCl_3$ )  $\delta$  141.6, 140.1, 140.0, 133.7, 131.3, 129.0, 128.8, 127.6, 124.6, 124.4, 123.7, 123.6, 122.0, 42.9; HRMS (EI)  $m/z$   $[M + H]^+$  calculated for  $C_{15}H_{14}NS$ : 240.0847, found 240.0845.

**2-(benzo[b]thiophen-2-yl)benzoic acid (6a)**

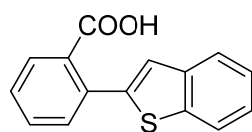

20.8 mg (82%); white solid;  $^1H$  NMR (400 MHz,  $CDCl_3$ )  $\delta$  7.87 – 7.83 (m, 1H), 7.79 (dd,  $J = 7.2, 1.8$  Hz, 1H), 7.72 (dd,  $J = 7.5, 1.6$  Hz, 1H), 7.56 (dd,  $J = 7.6, 1.5$  Hz, 1H), 7.52 (dd,  $J = 7.4, 1.6$  Hz, 1H), 7.50 – 7.45 (m, 1H), 7.43 (s, 1H), 7.37 (td,  $J = 6.9, 1.6$  Hz, 2H);  $^{13}C$  NMR (100 MHz,  $CDCl_3$ )  $\delta$  171.0, 141.0, 140.3, 140.1, 135.3, 131.9, 130.9, 130.3, 128.8, 128.6, 124.7, 124.7, 123.9, 123.9, 122.1;

**5H-benzo[4,5]thieno[3,2-c]isochromen-5-one (7a)**

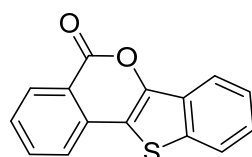

17.4 mg (69%); light yellow solid;  $^1H$  NMR (400 MHz,  $CDCl_3$ )  $\delta$  8.39 (dt,  $J = 8.0, 1.5$  Hz, 1H), 8.01 (dt,  $J = 6.5, 2.0$  Hz, 1H), 7.85 – 7.75 (m, 2H), 7.60 (dd,  $J = 7.8, 2.3$  Hz, 1H), 7.54 (t,  $J = 7.7$  Hz, 1H), 7.50 – 7.42 (m, 2H).  $^{13}C$  NMR (100 MHz,  $CDCl_3$ )  $\delta$  161.80, 144.94, 136.47, 135.32, 133.90, 131.19, 129.65, 128.40, 127.00, 125.33, 123.19, 122.84, 121.12, 119.82, 115.26.

**2-(5-(m-tolyl)thiophen-2-yl)benzonitrile (5d)**

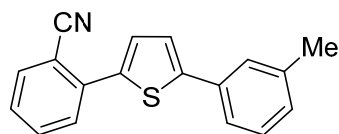

24 mg (88%); light yellow solid;  $^1H$  NMR (400 MHz,  $CDCl_3$ )  $\delta$  8.39 (dt,  $J = 8.0, 1.5$  Hz, 1H), 8.01 (dt,  $J = 6.5, 2.0$  Hz, 1H), 7.85 – 7.75 (m, 2H), 7.60 (dd,  $J = 7.8, 2.3$  Hz, 1H), 7.54 (t,  $J = 7.7$  Hz, 1H), 7.50 – 7.42 (m, 2H).  $^{13}C$  NMR (100 MHz,  $CDCl_3$ )  $\delta$  161.80, 144.94, 136.47, 135.32, 133.90, 131.19, 129.65, 128.40, 127.00, 125.33, 123.19, 122.84, 121.12, 119.82, 115.26.

**8.  $^1H$  and  $^{13}C$  NMR spectra.**

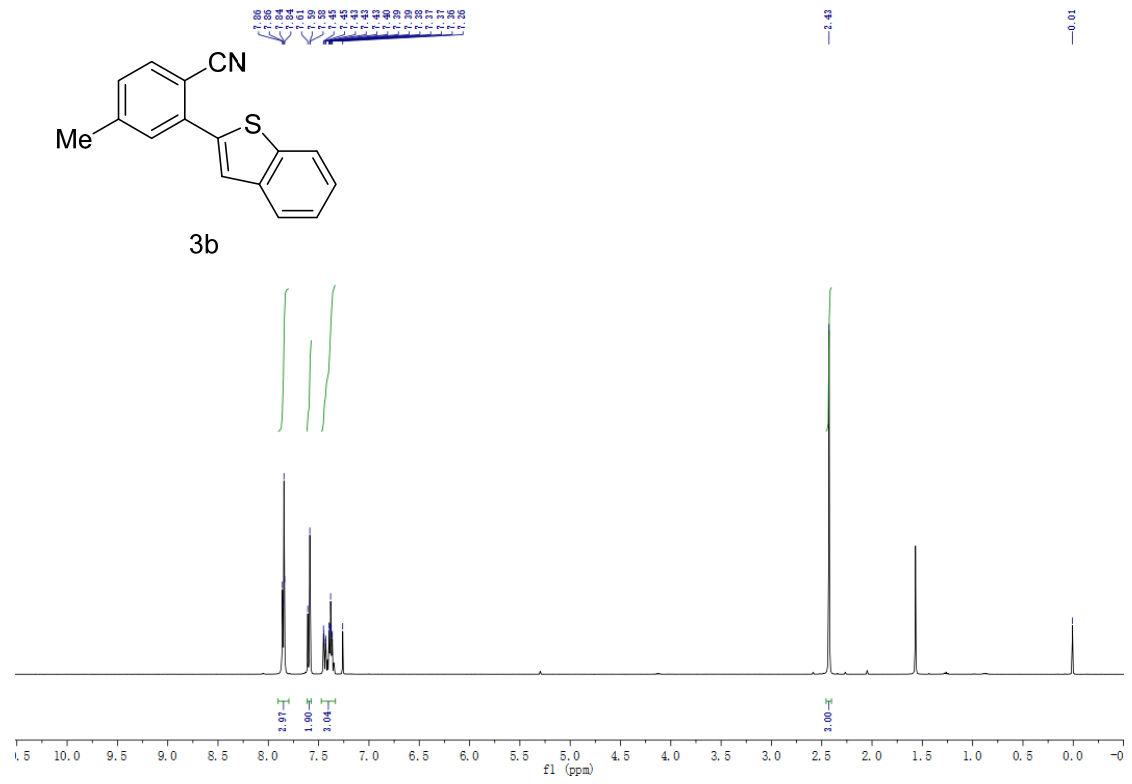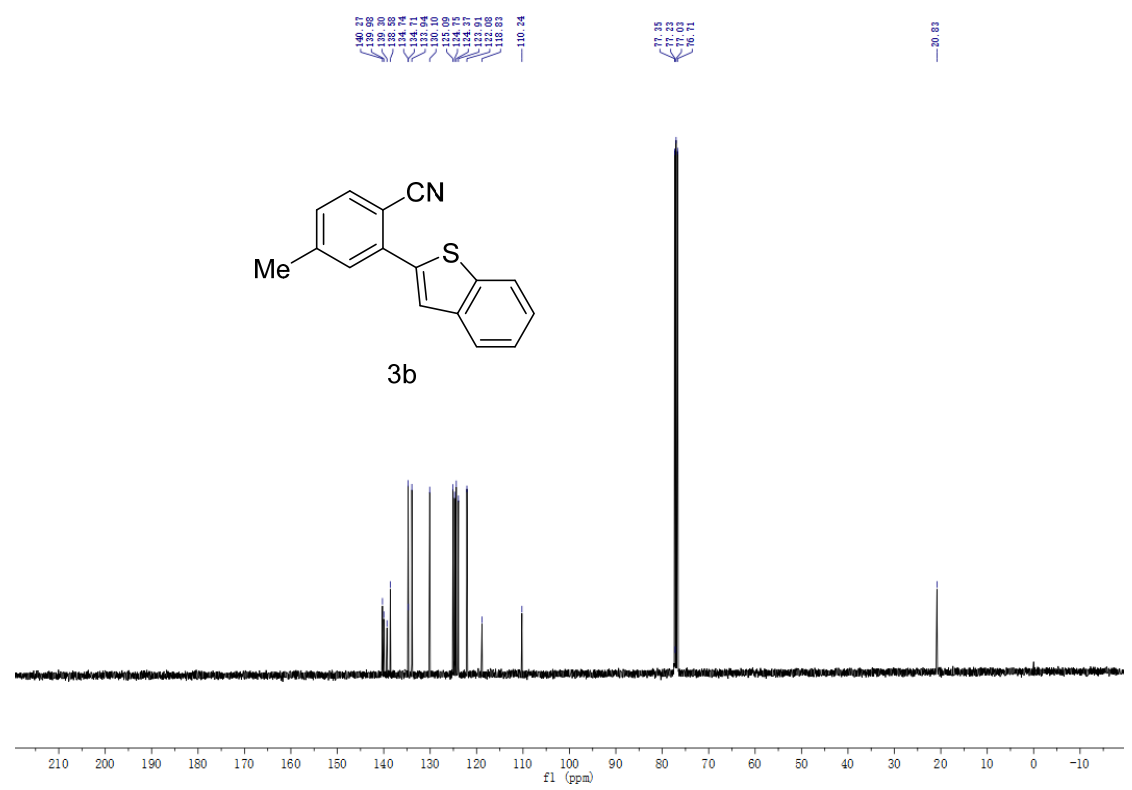

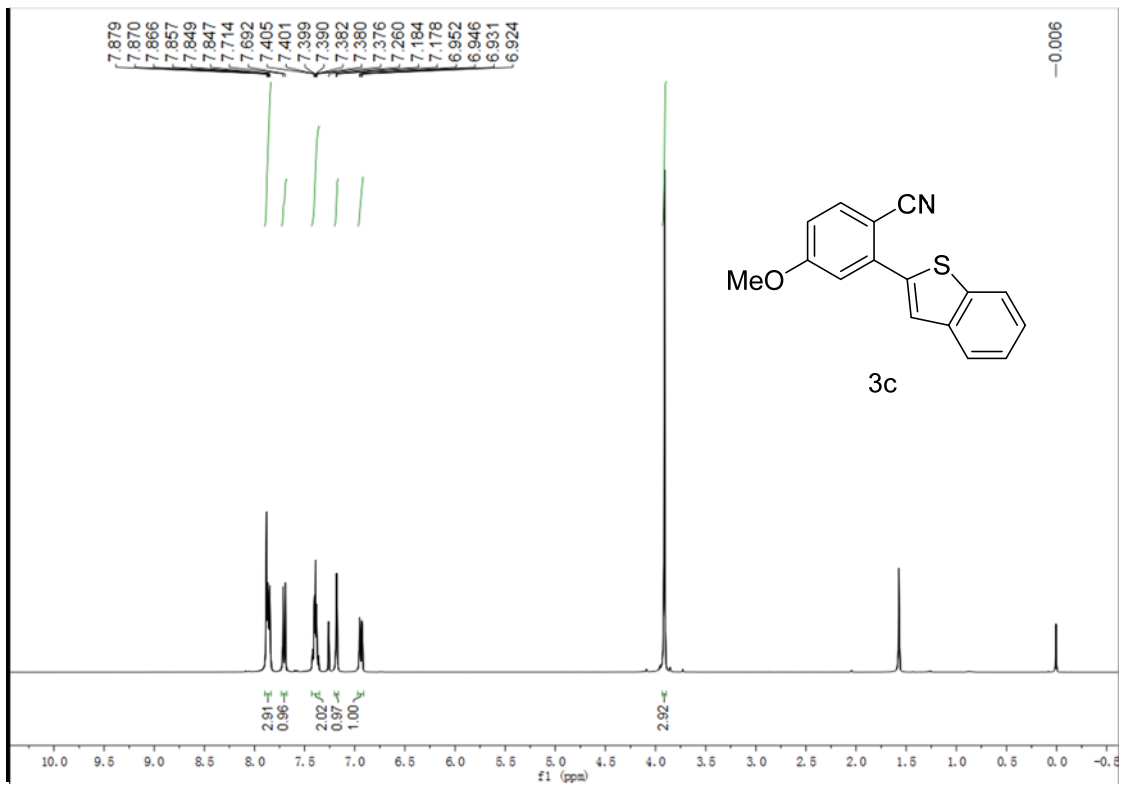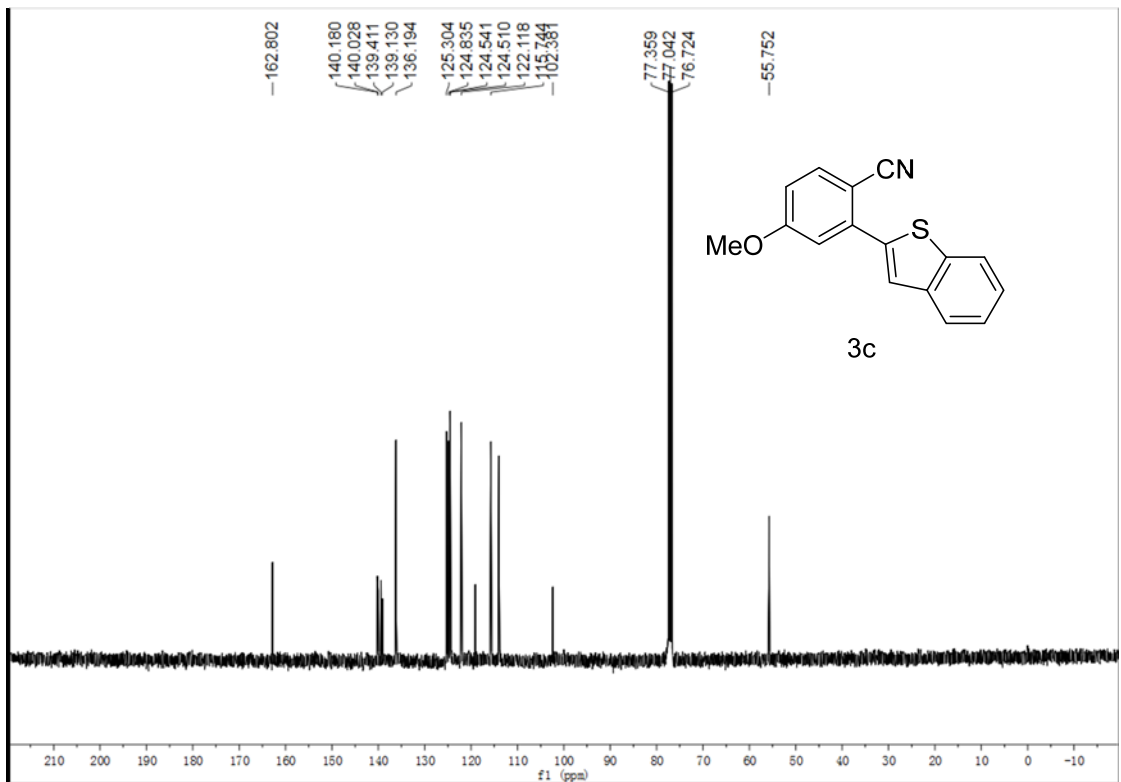

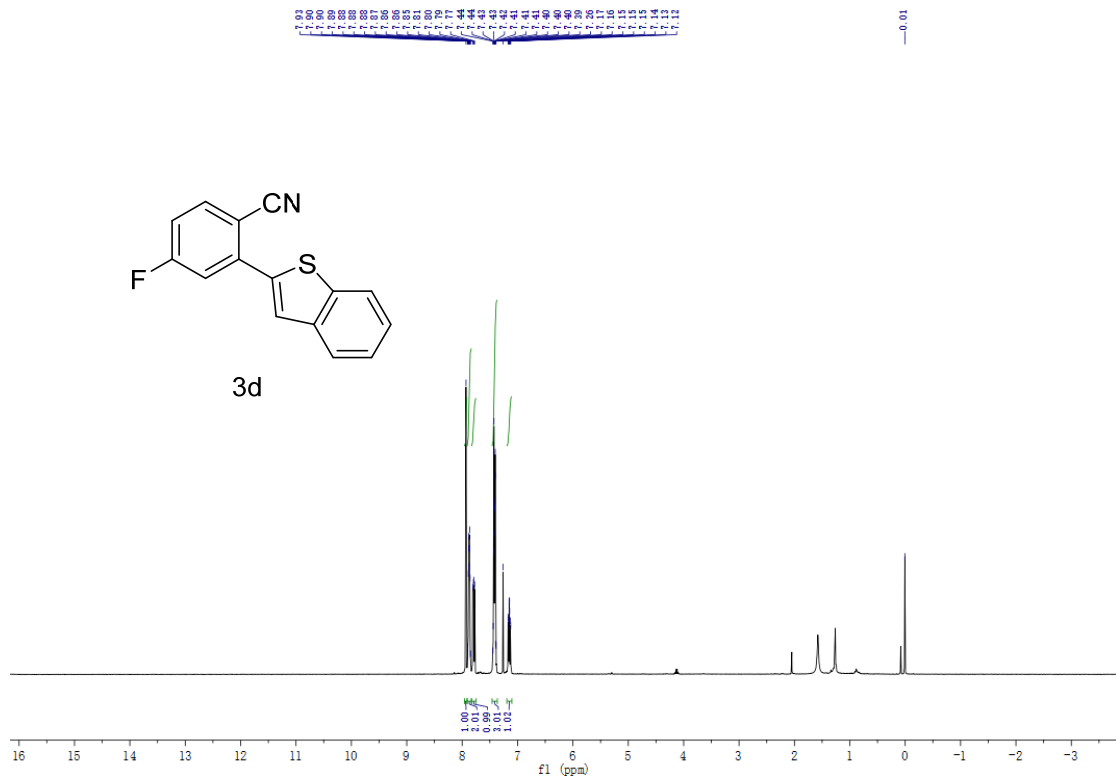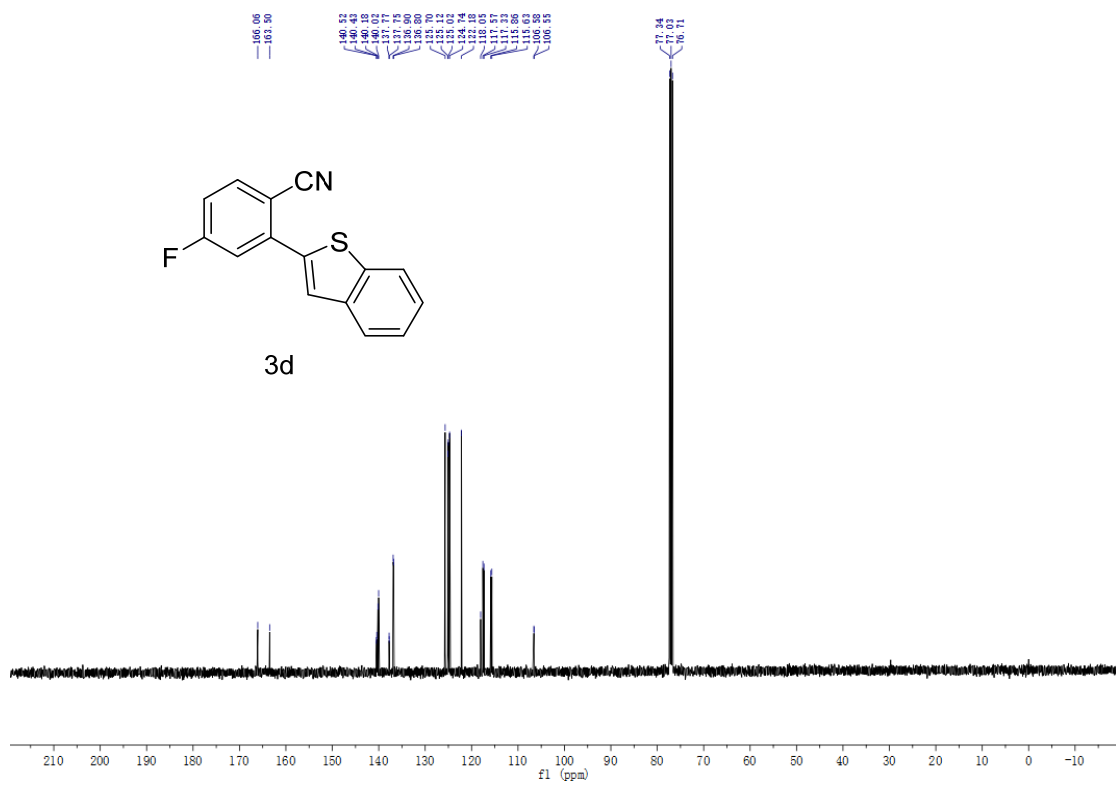

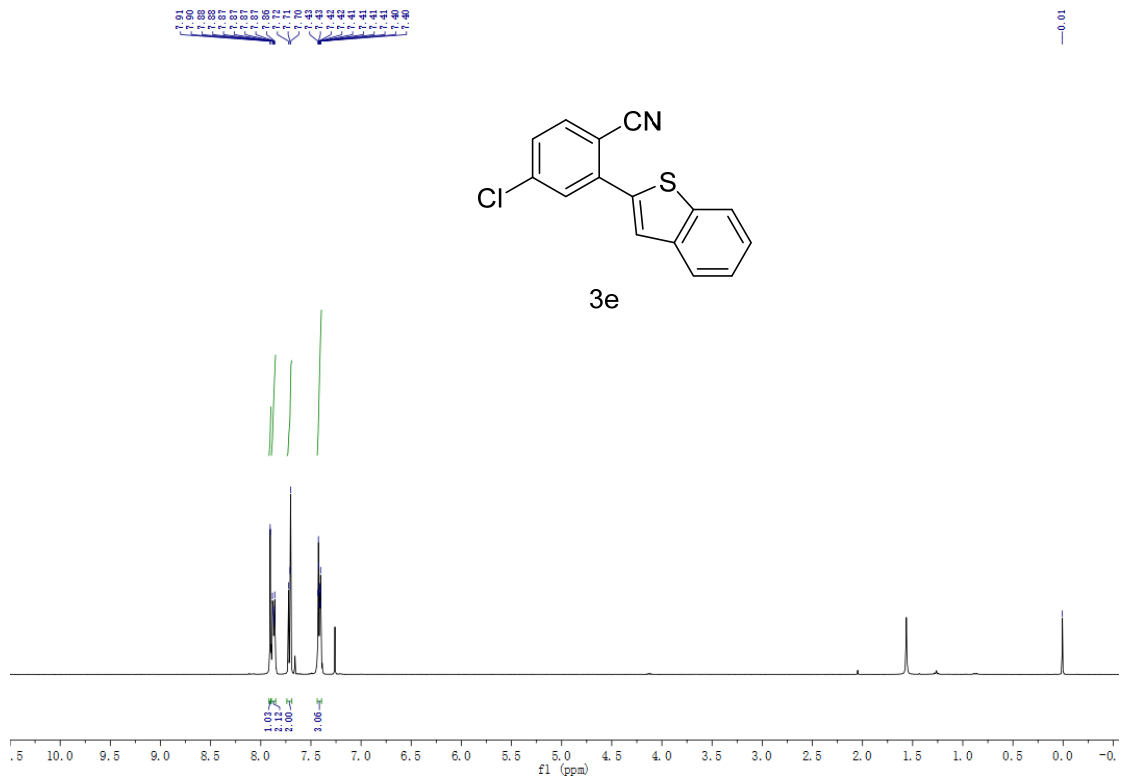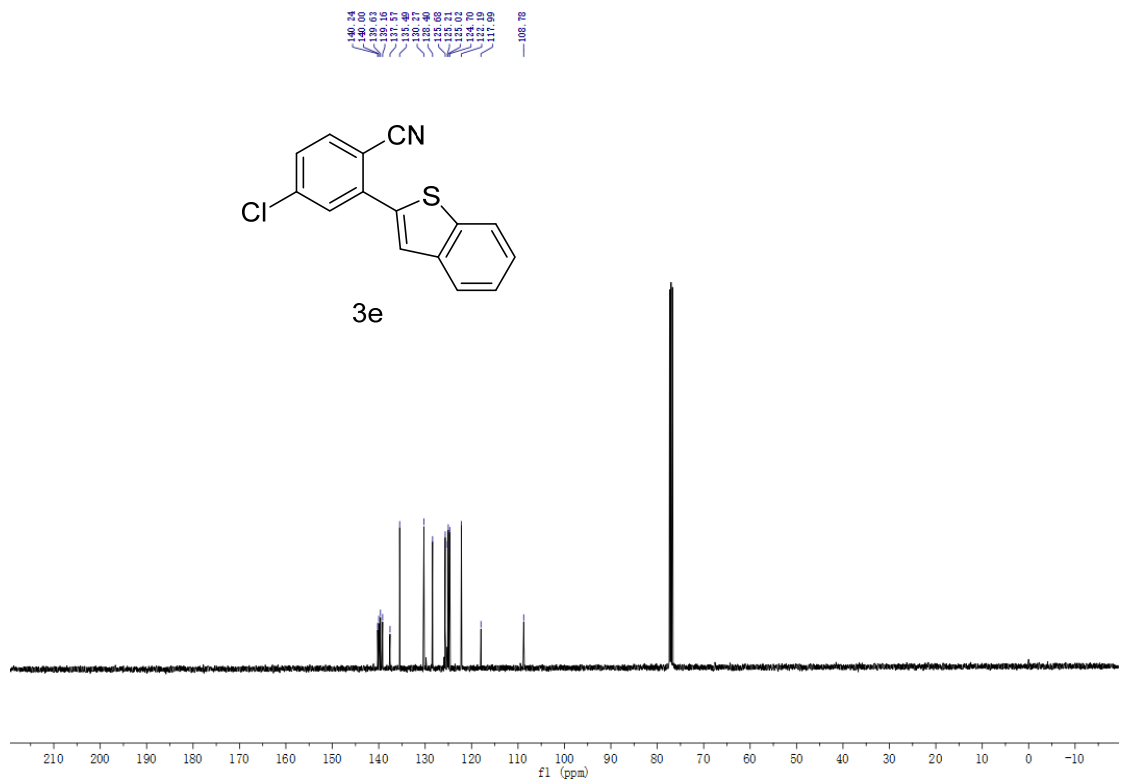

8.08  
8.07  
8.06  
8.05  
8.04  
8.03  
8.02  
8.01  
7.99  
7.98  
7.97  
7.96  
7.95  
7.94  
7.93  
7.92  
7.91  
7.90

-0.08

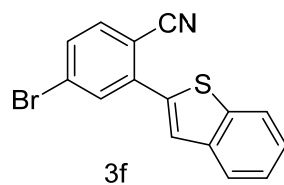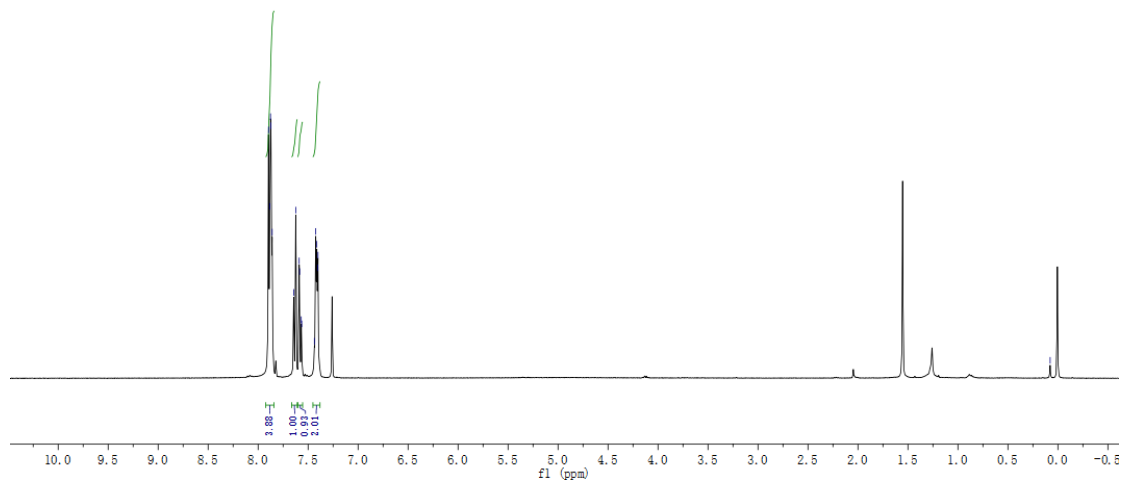

140.52  
139.16  
137.96  
133.19  
131.34  
131.68  
131.24  
124.70  
122.19  
118.07  
109.35

17.94  
17.82  
16.70

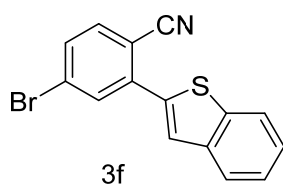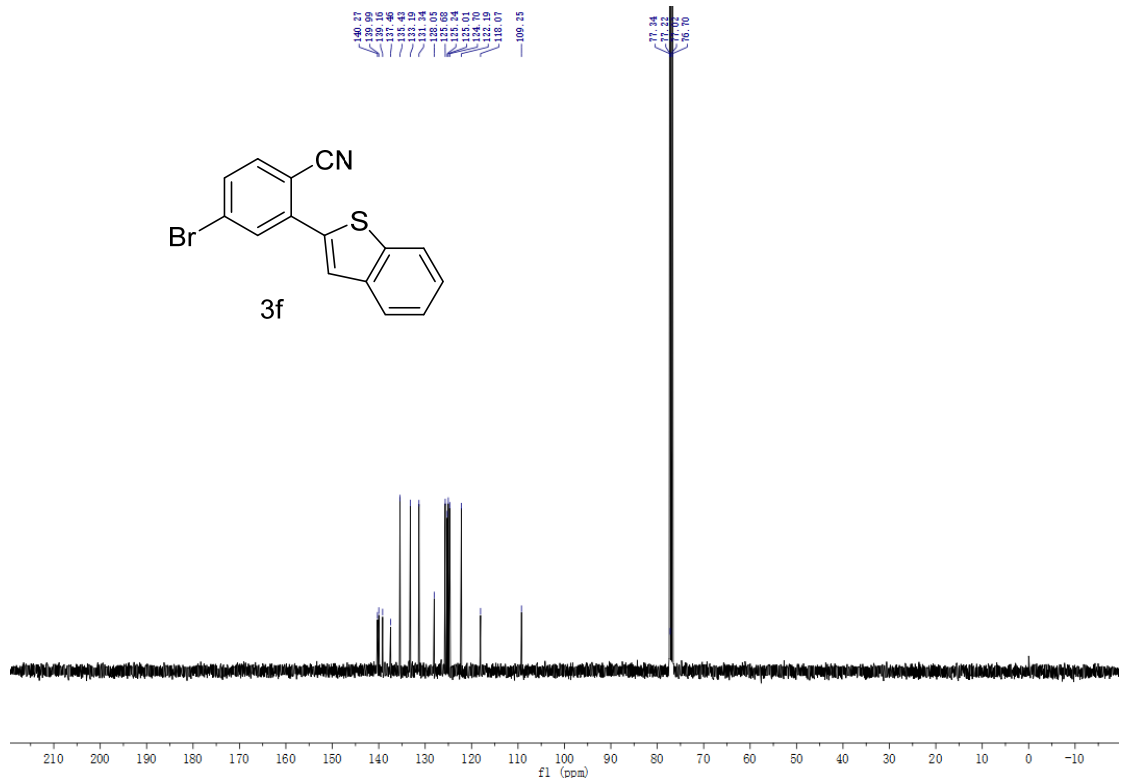

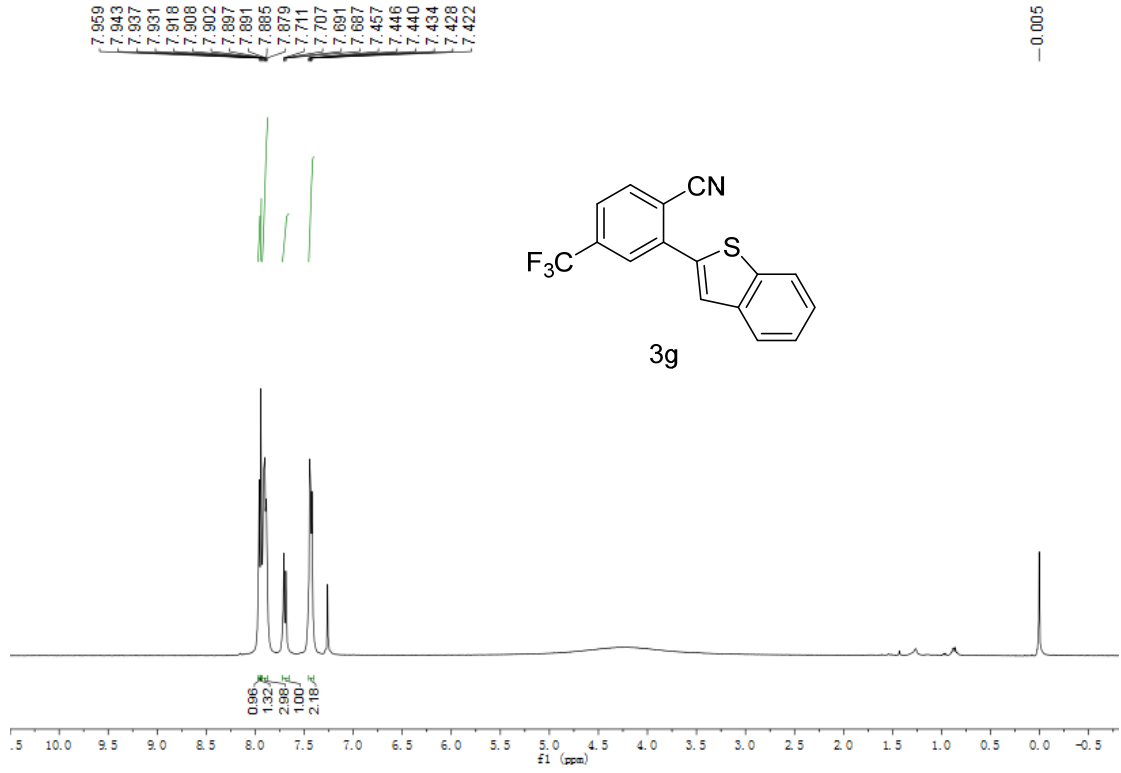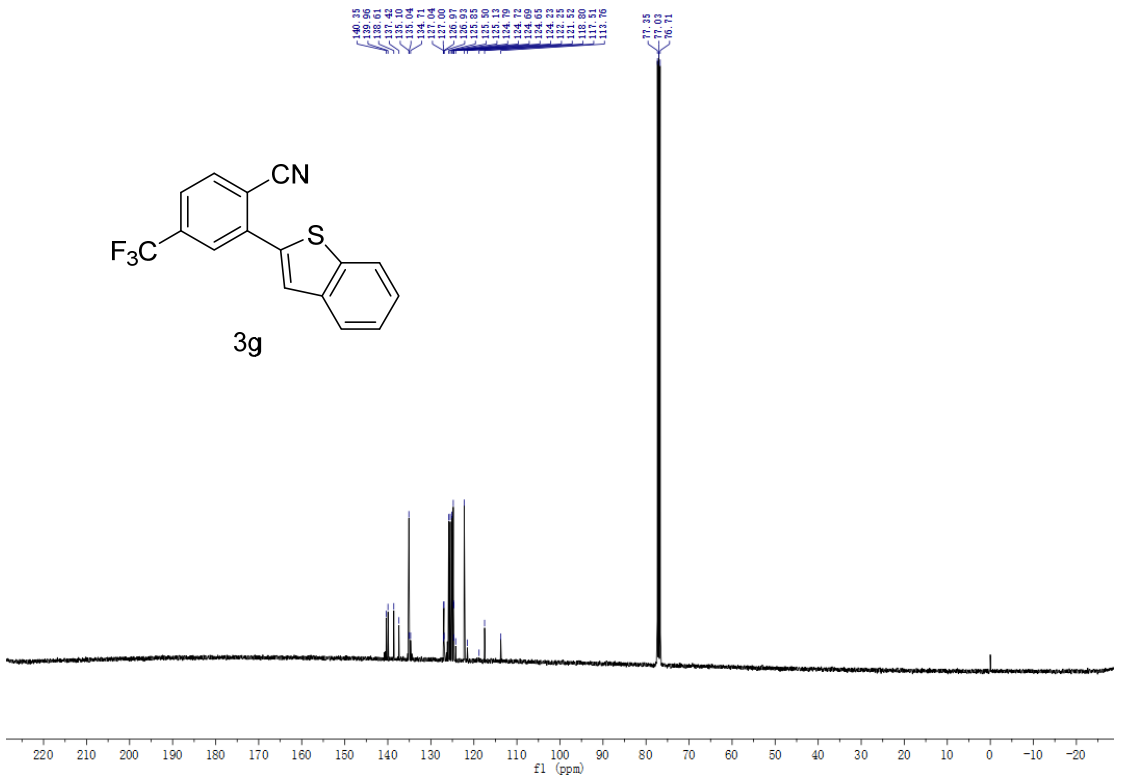



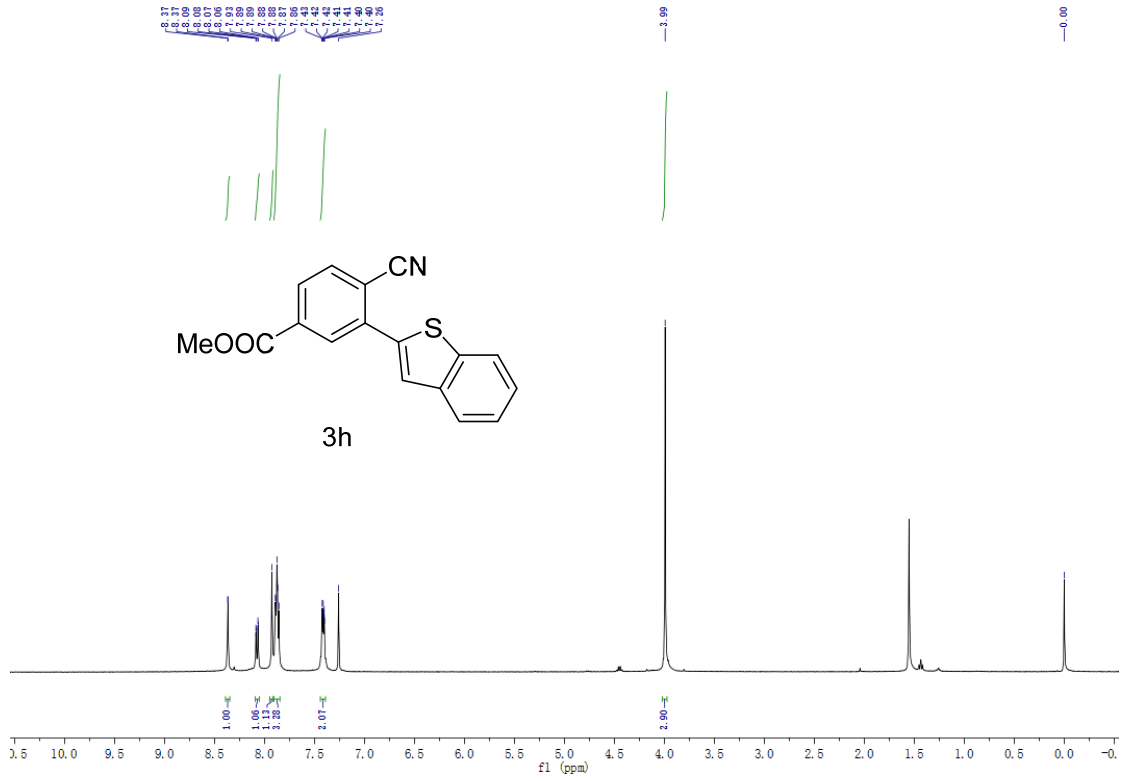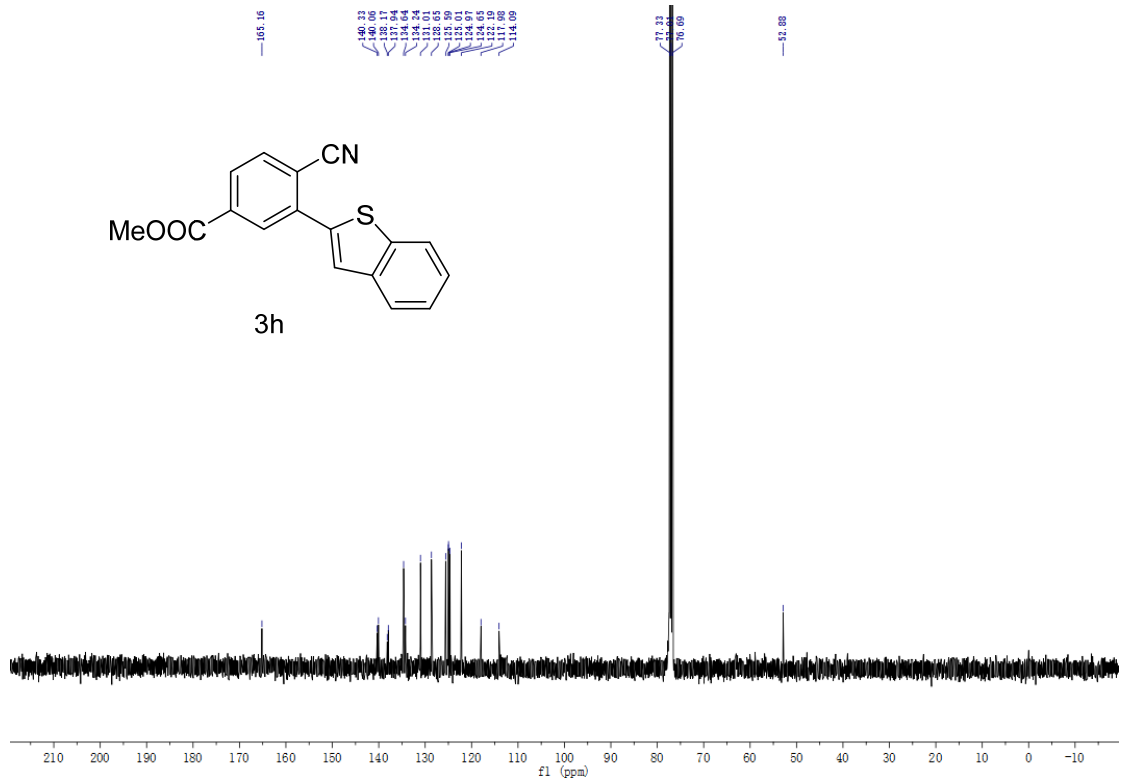



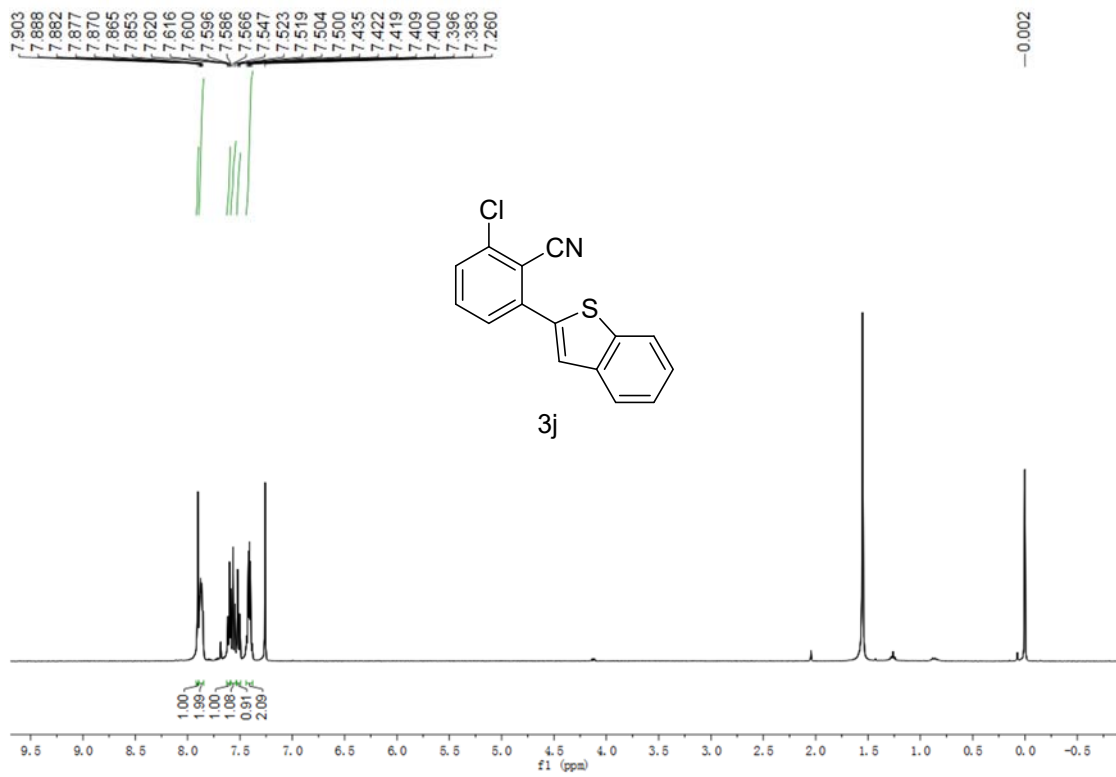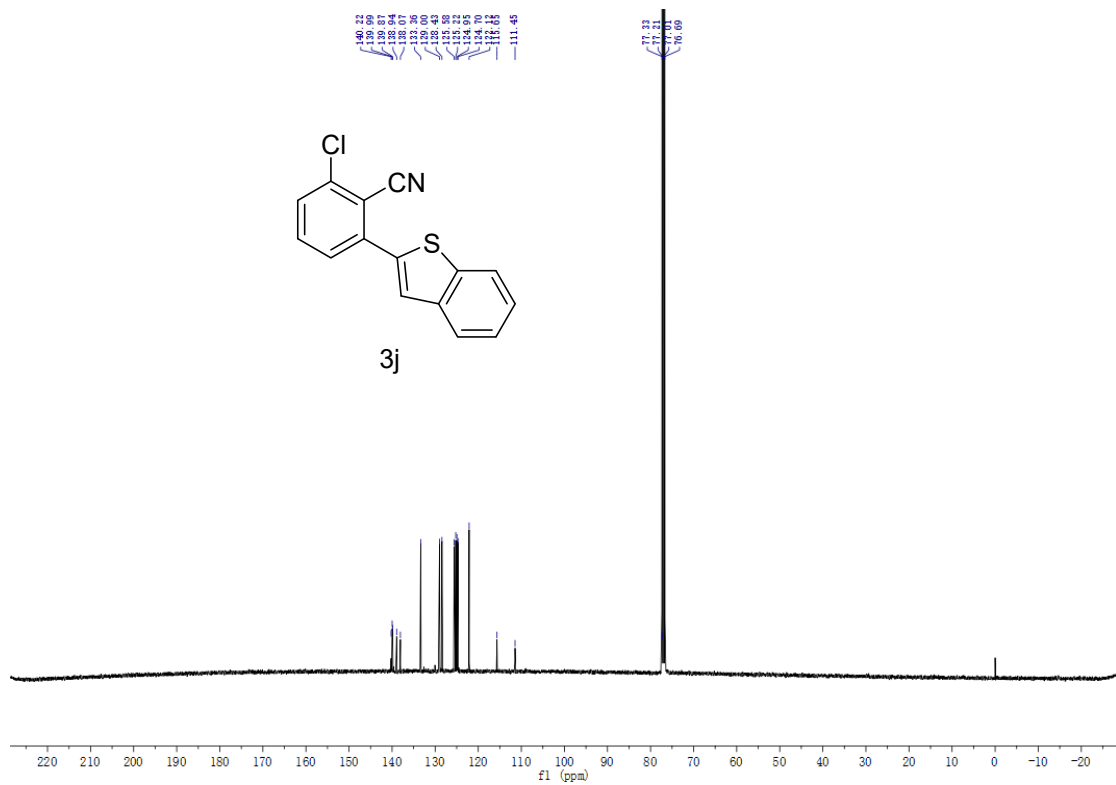

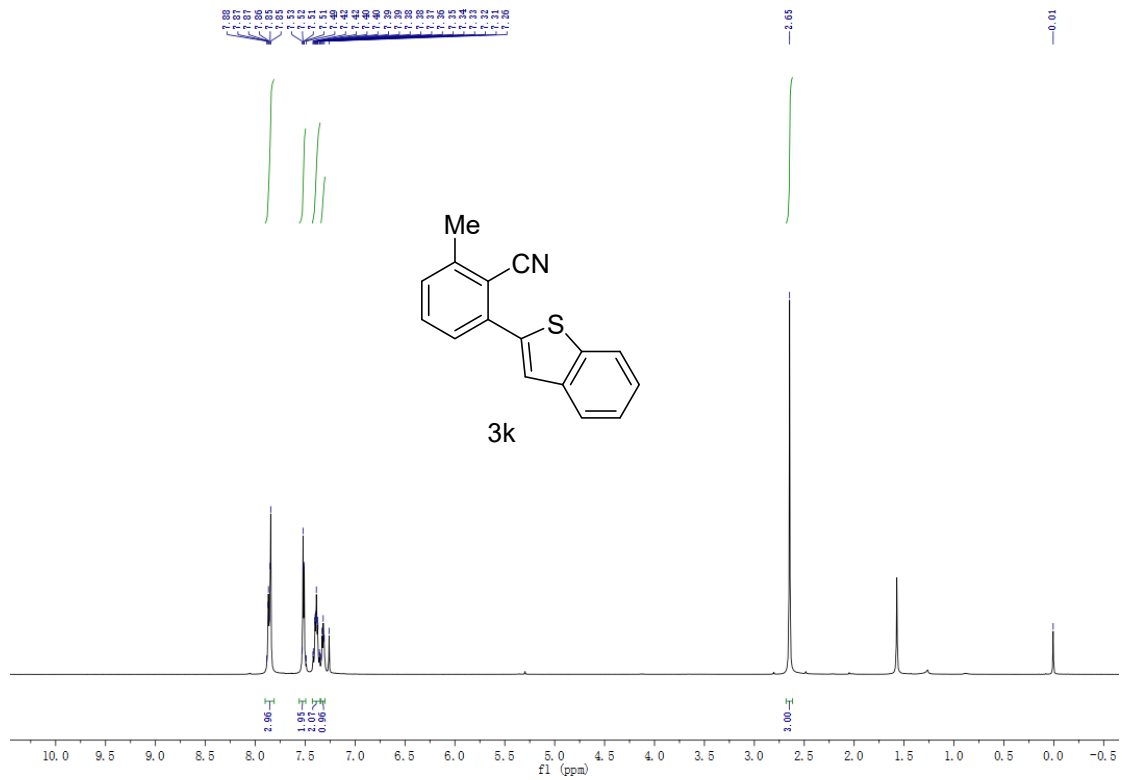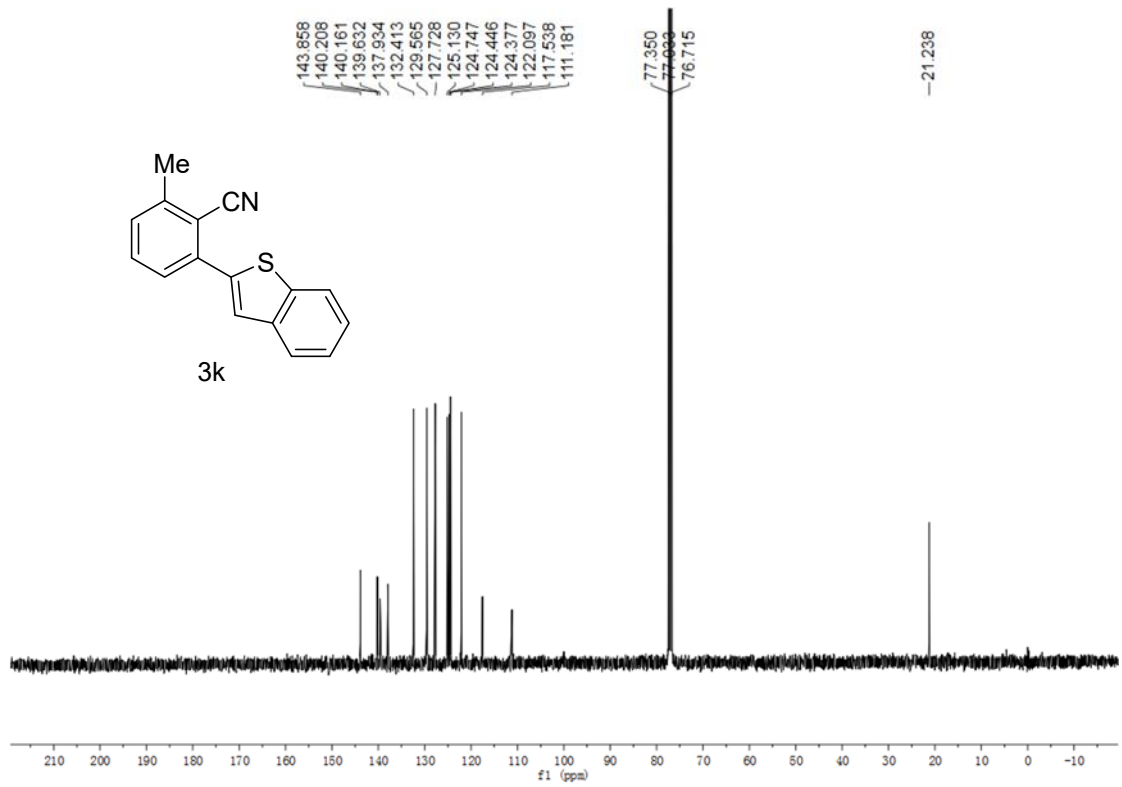

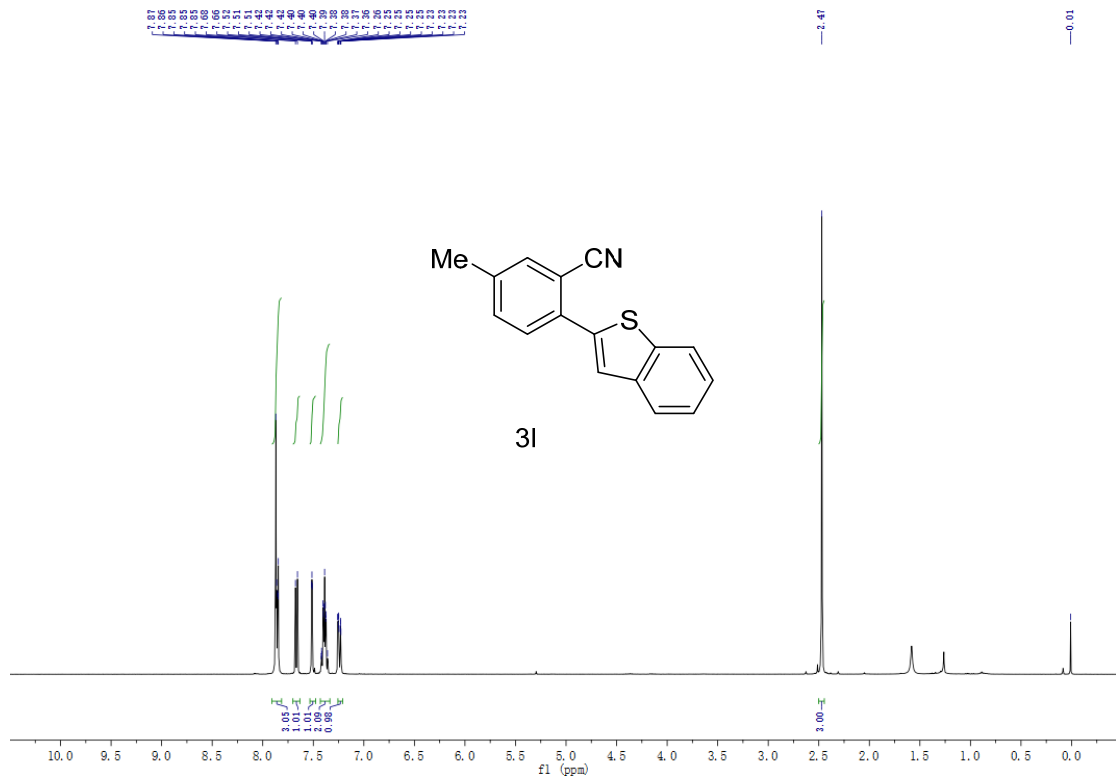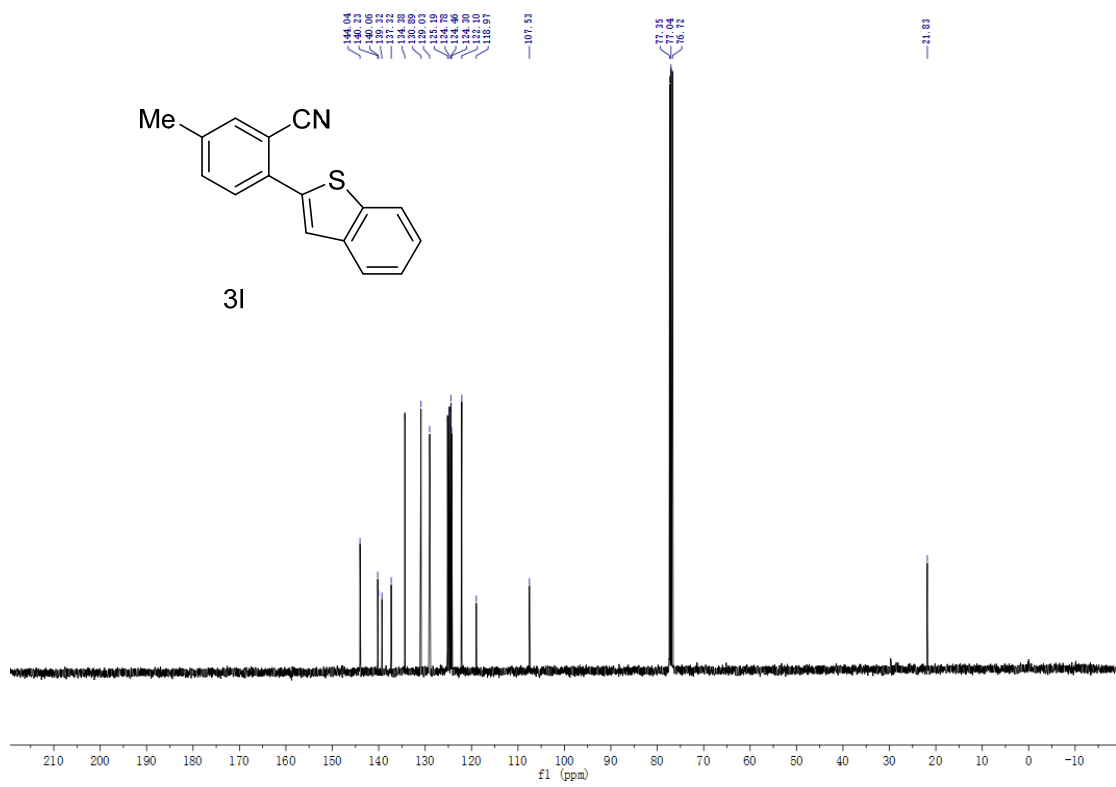









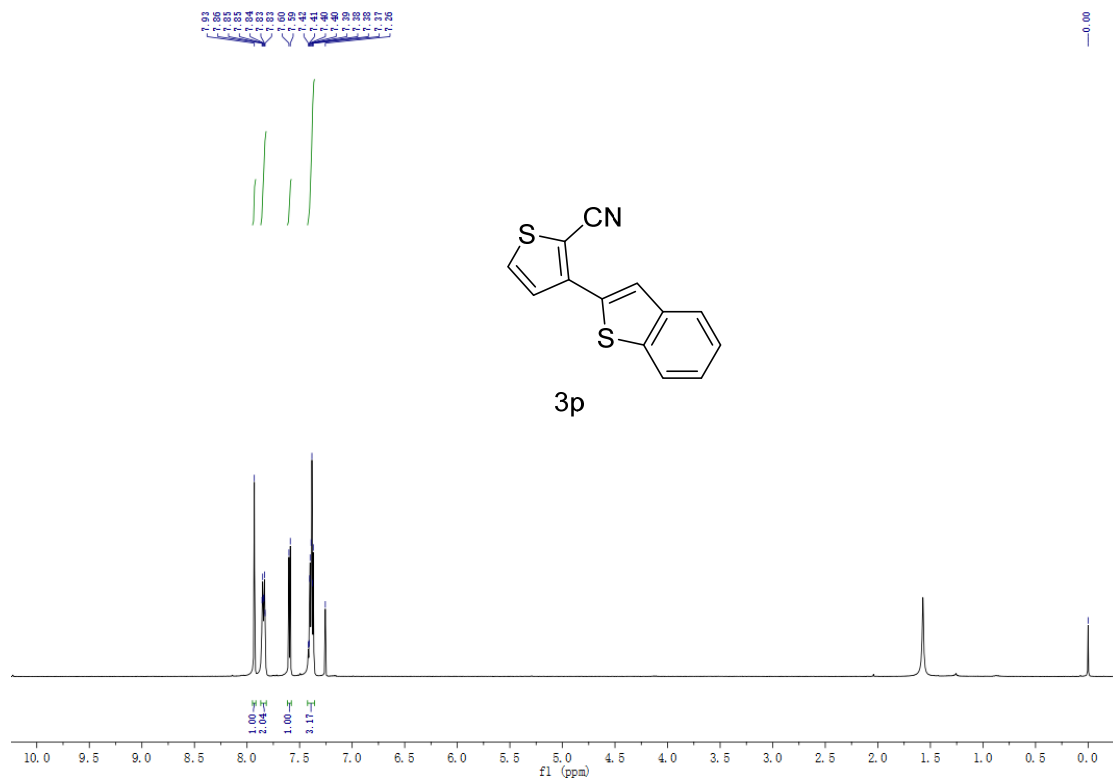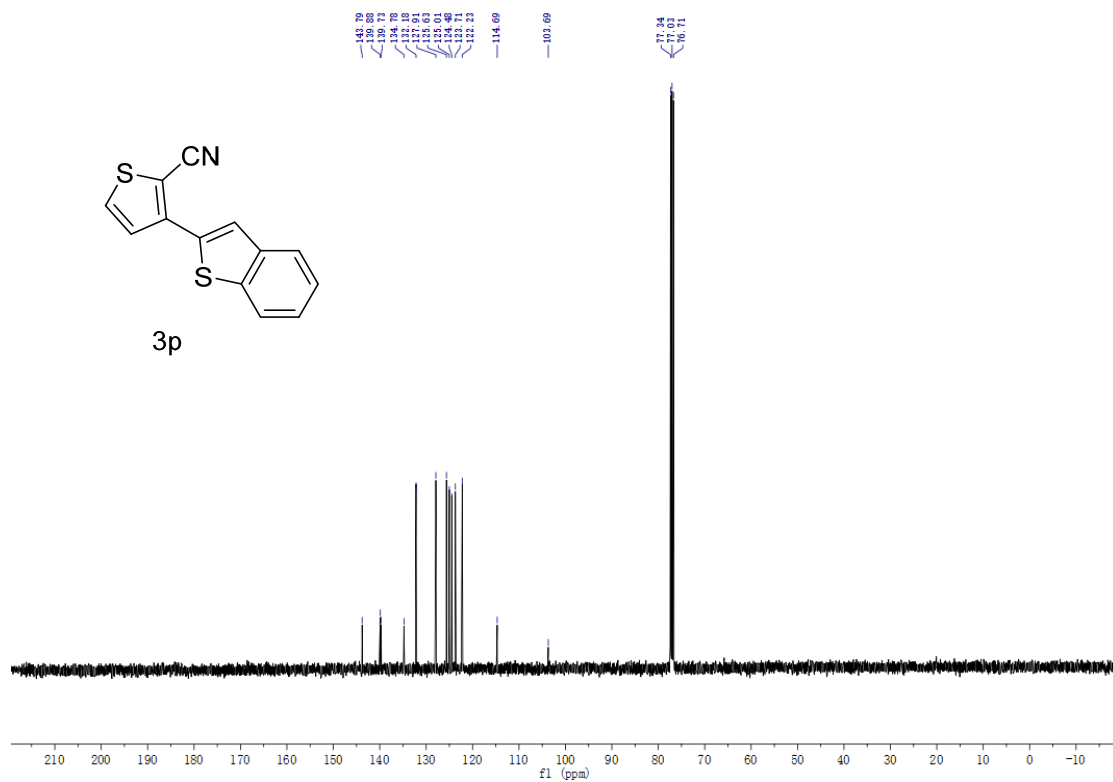



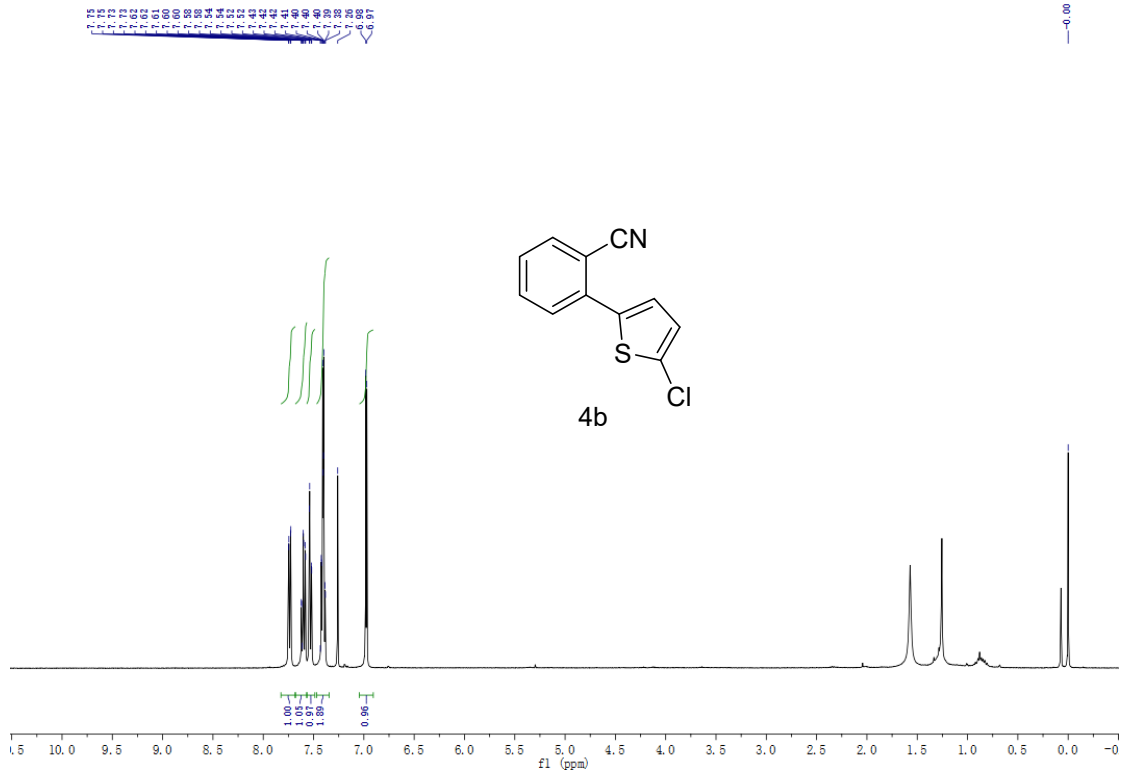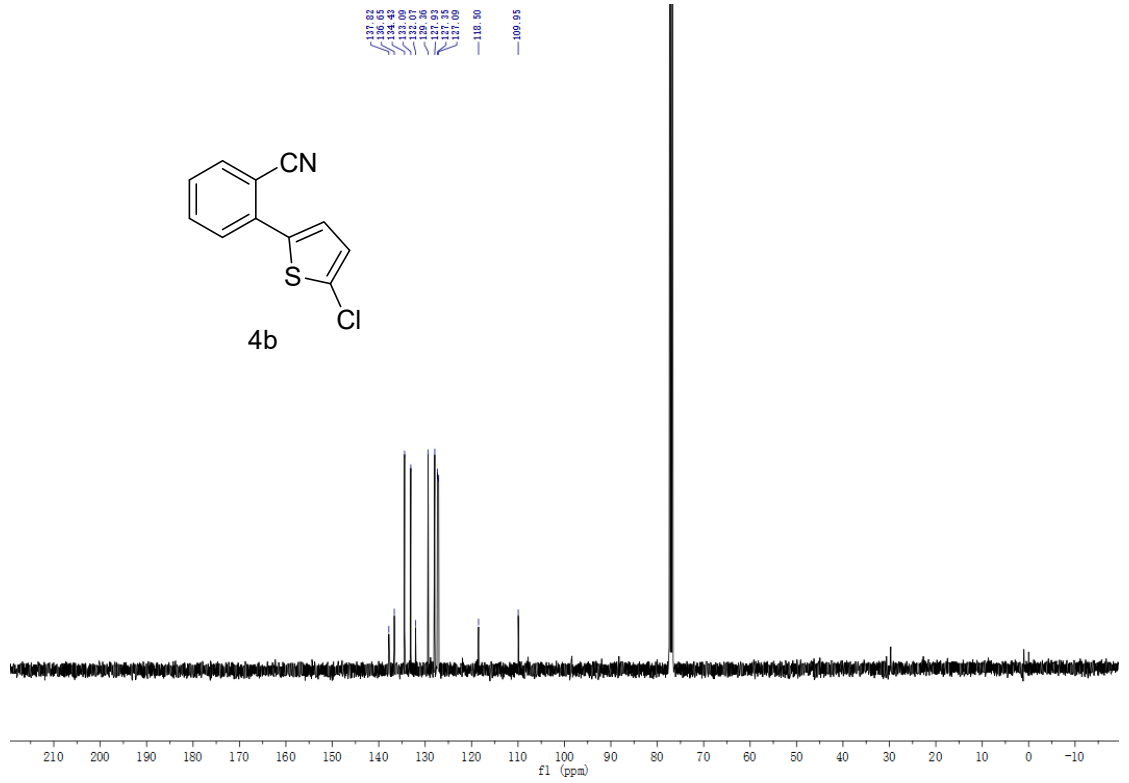

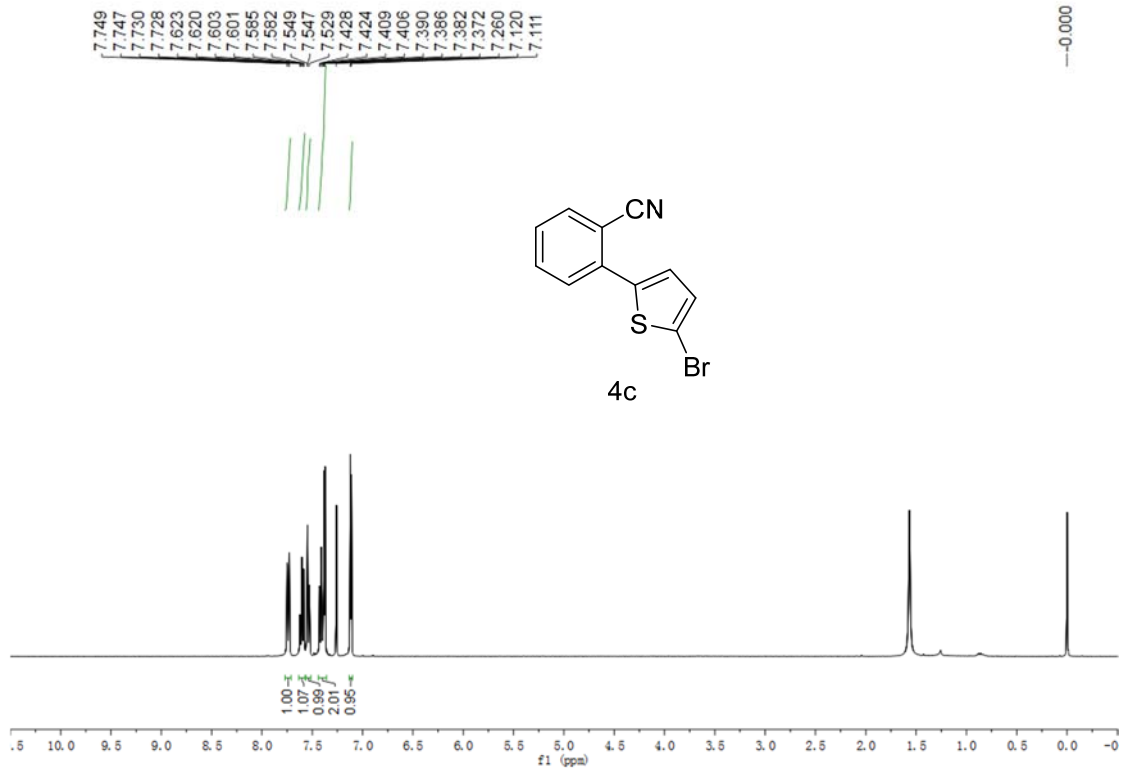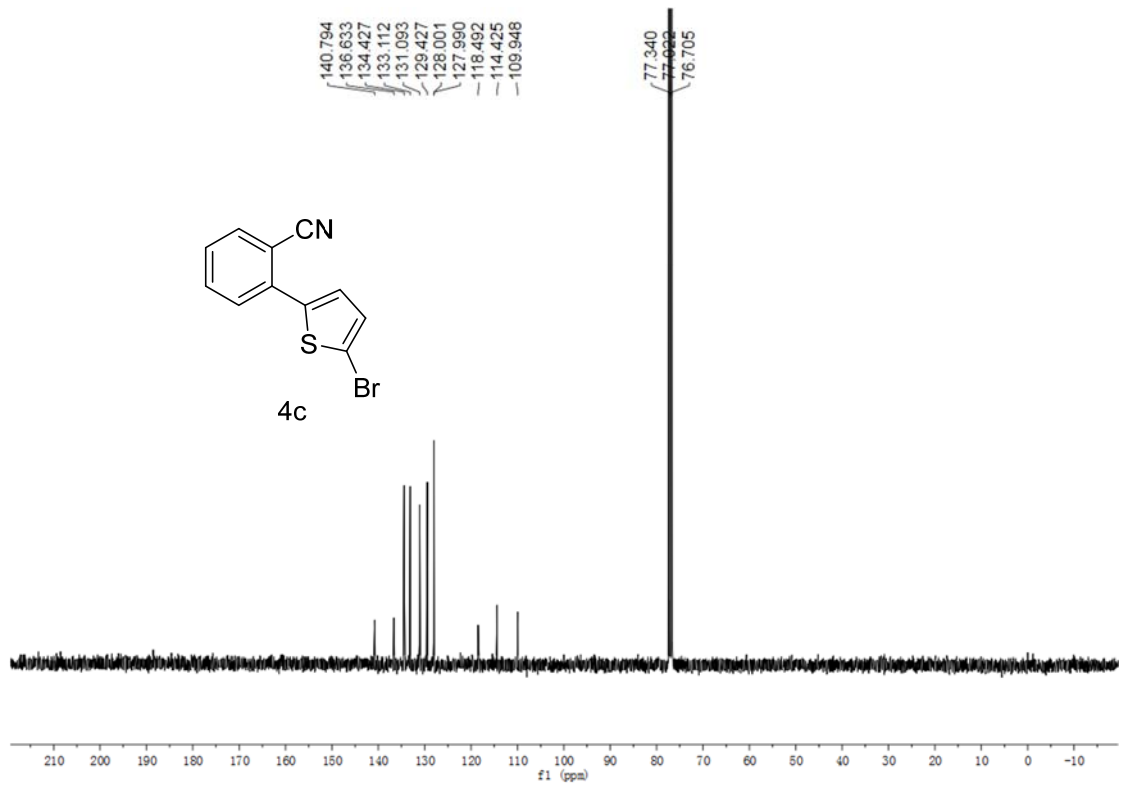

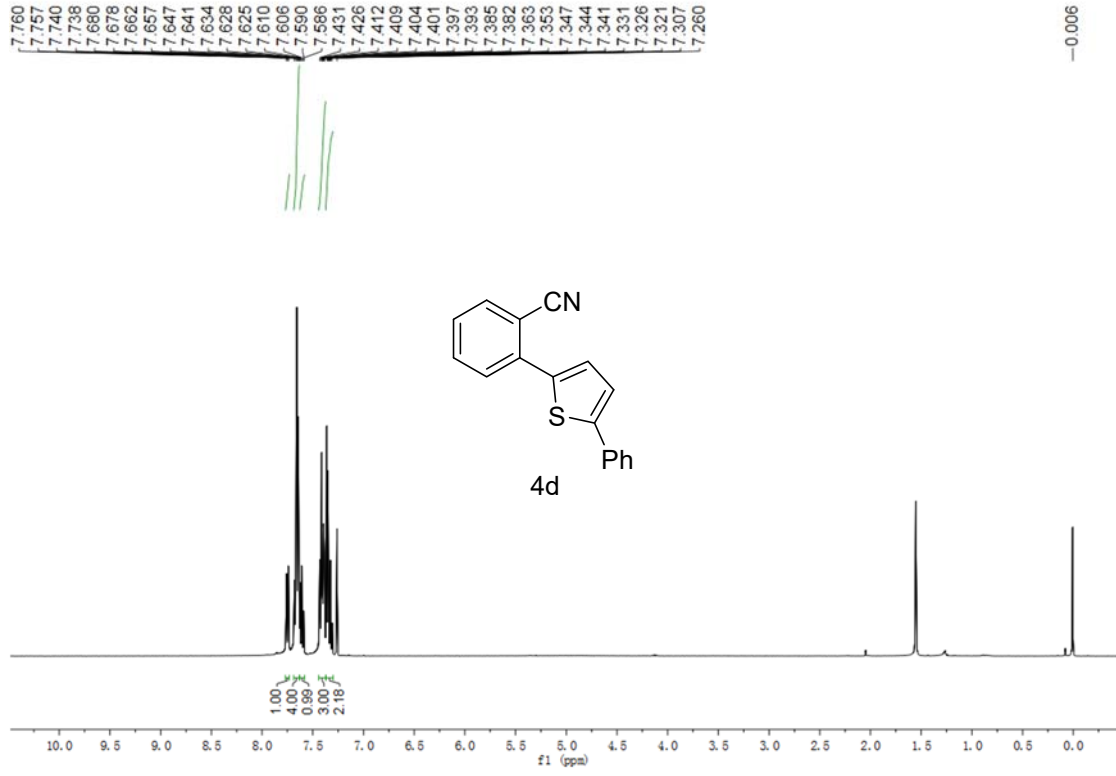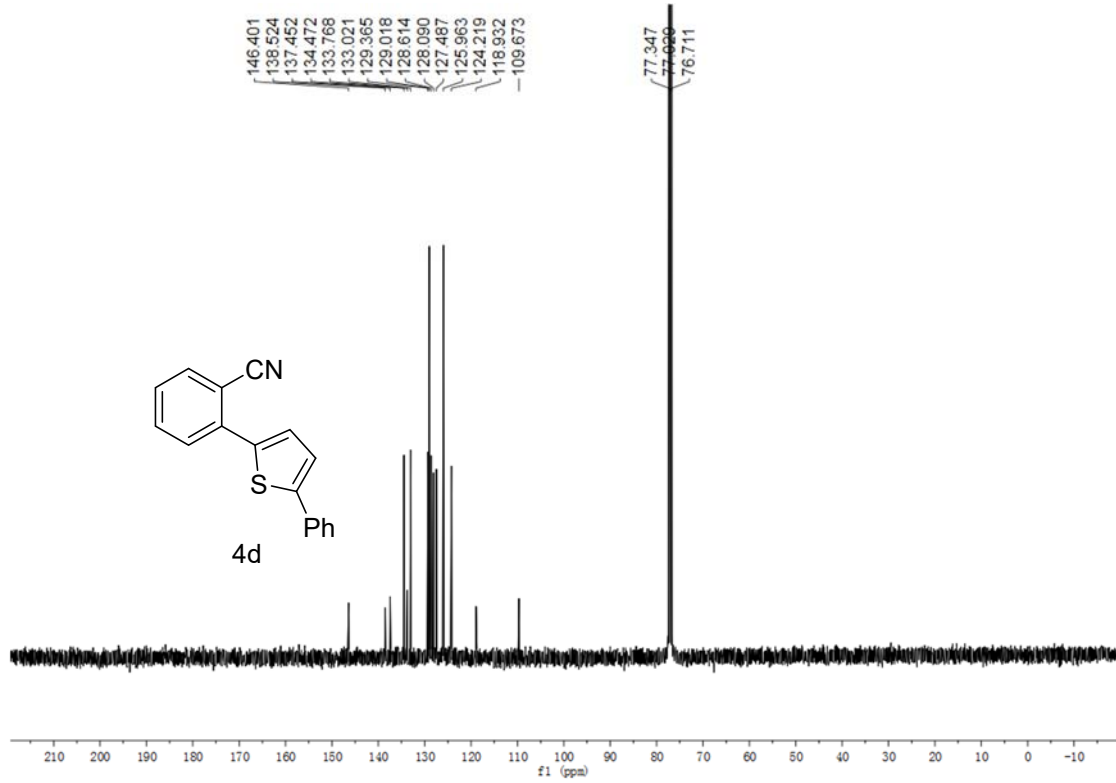

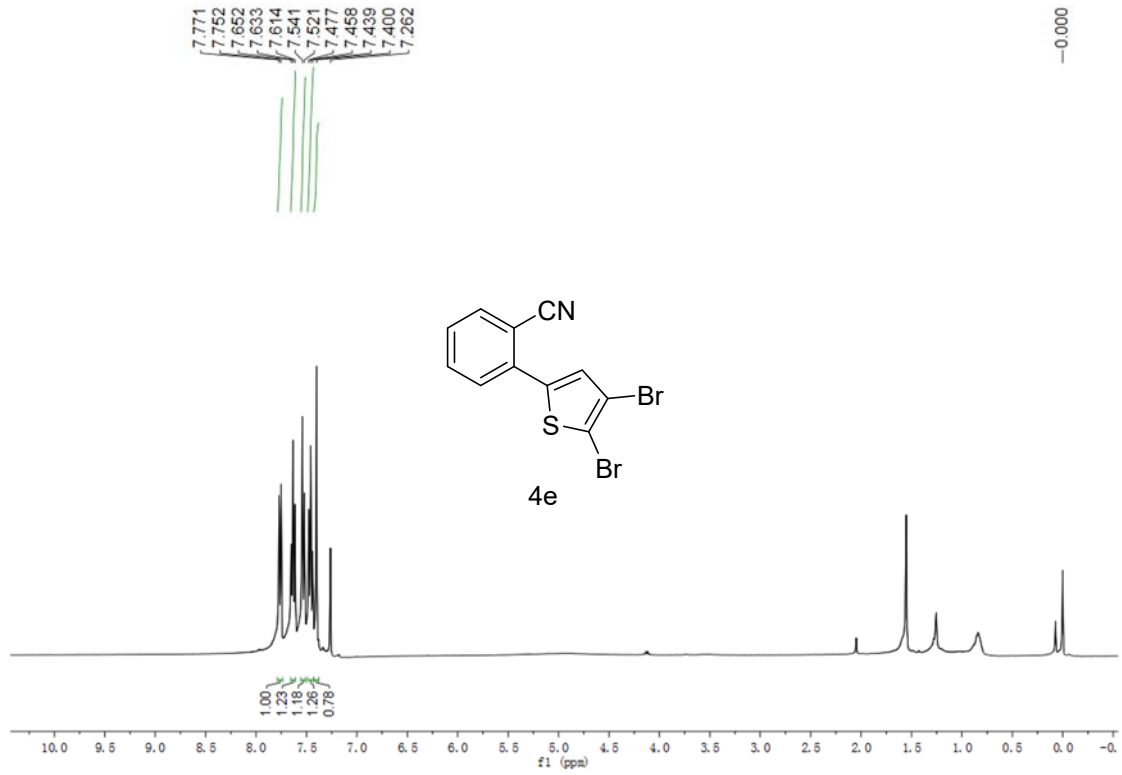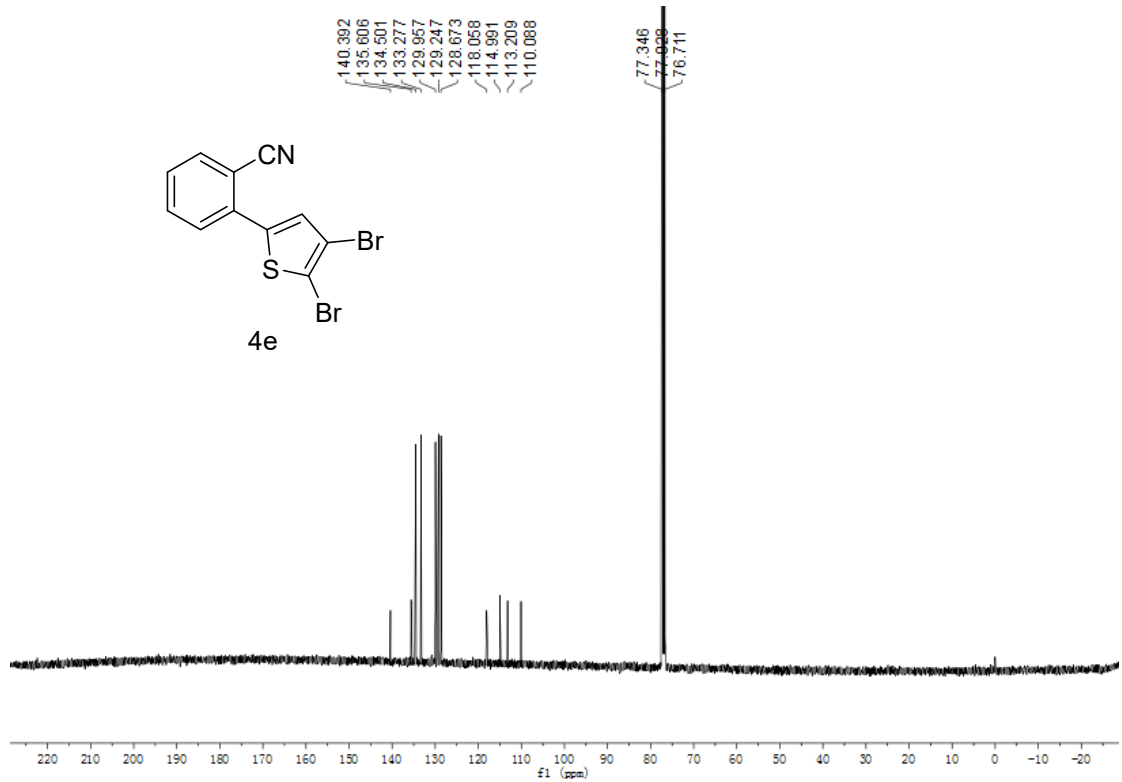

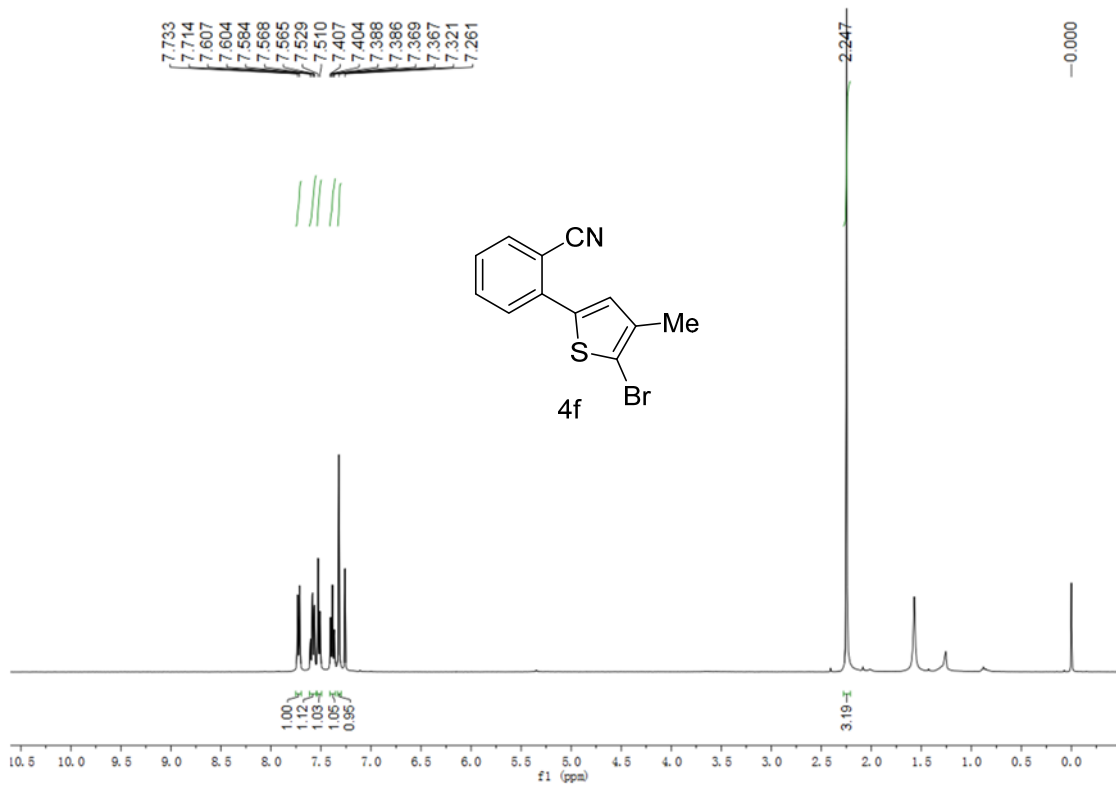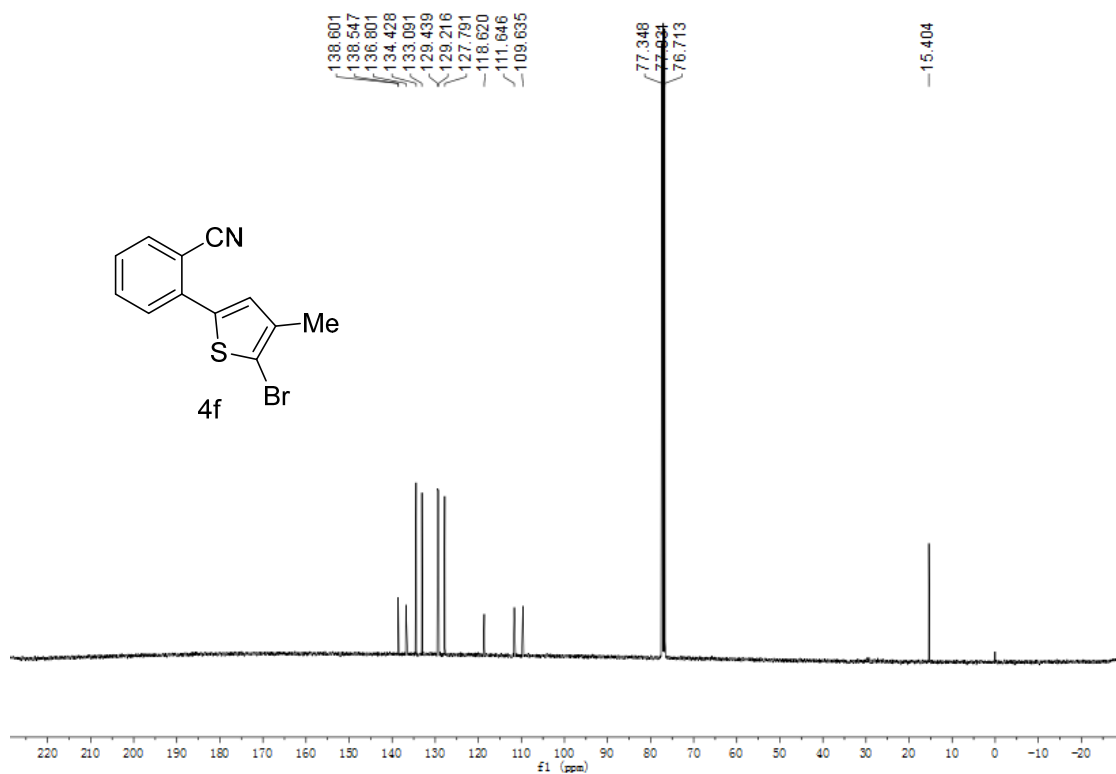

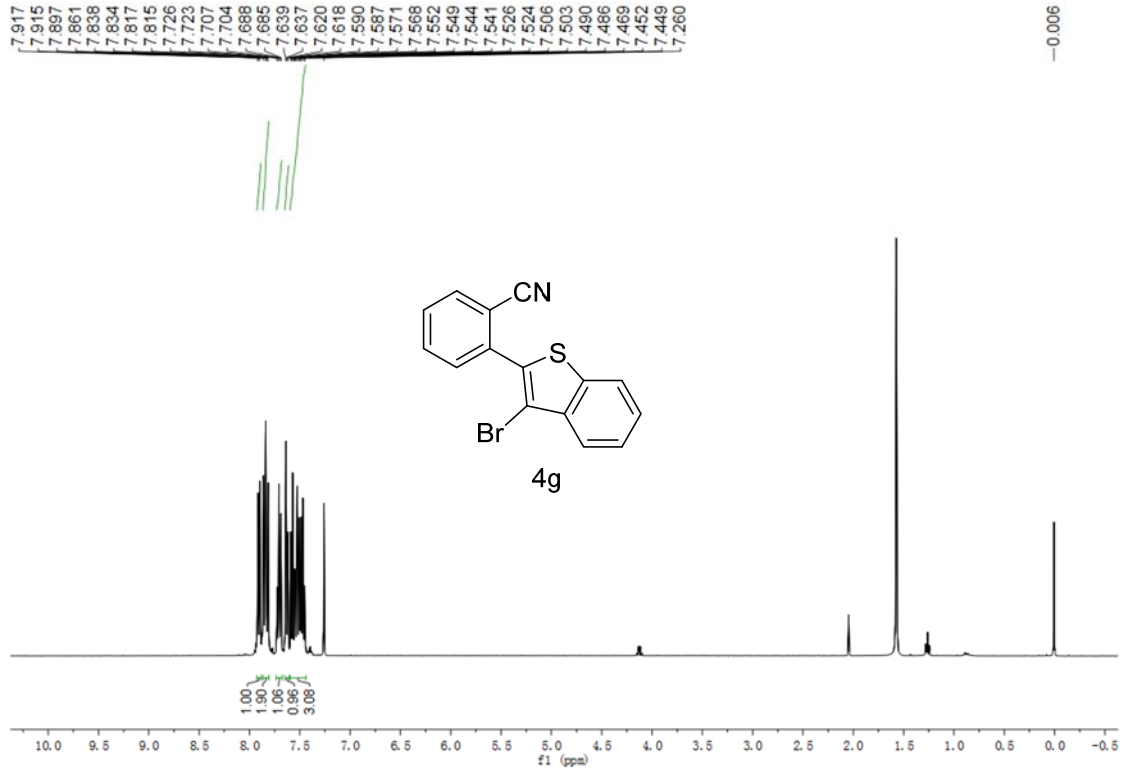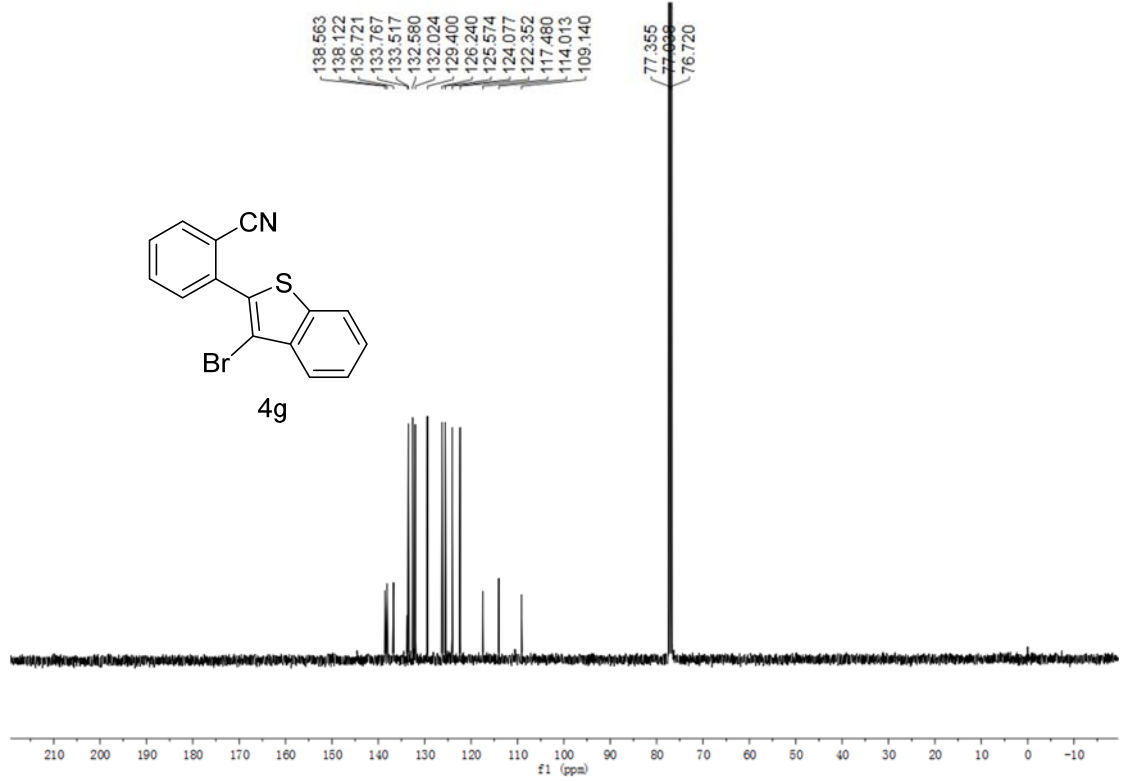



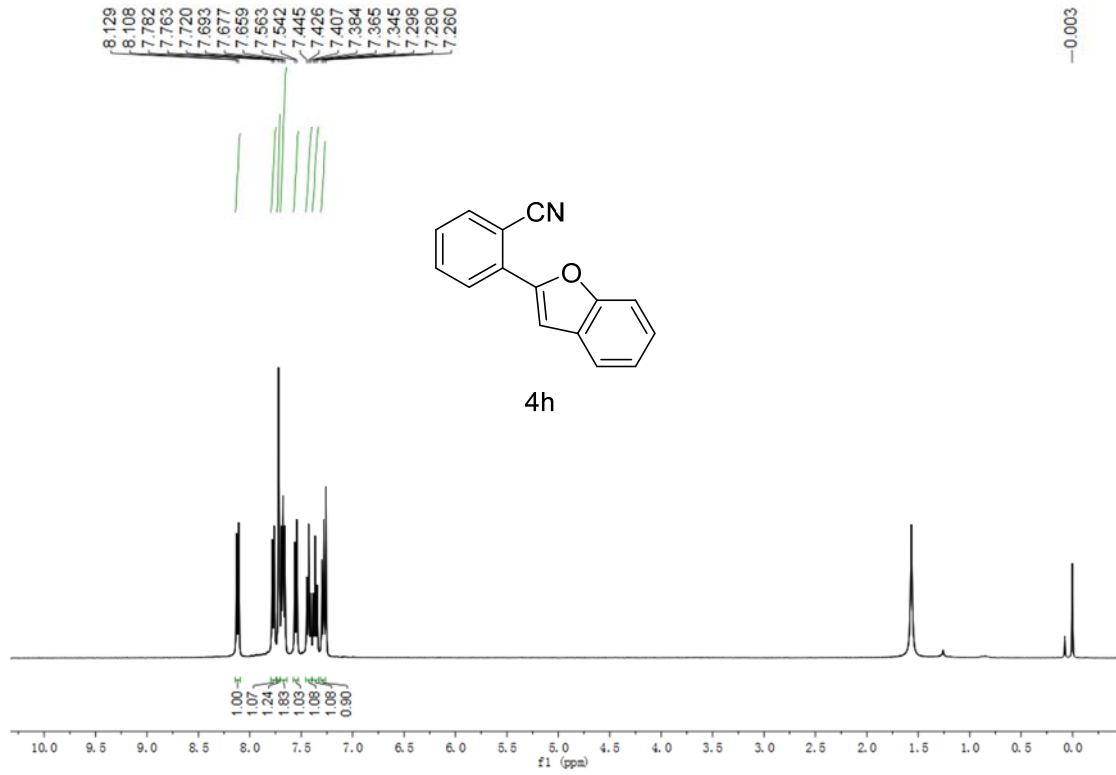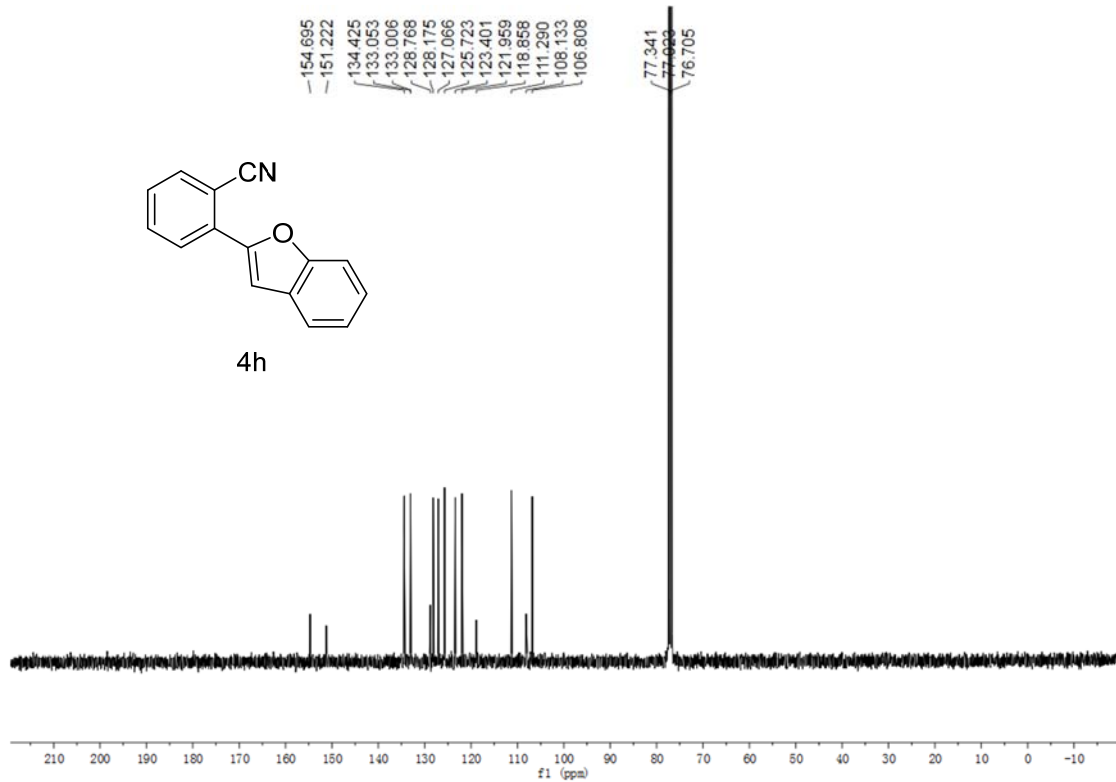

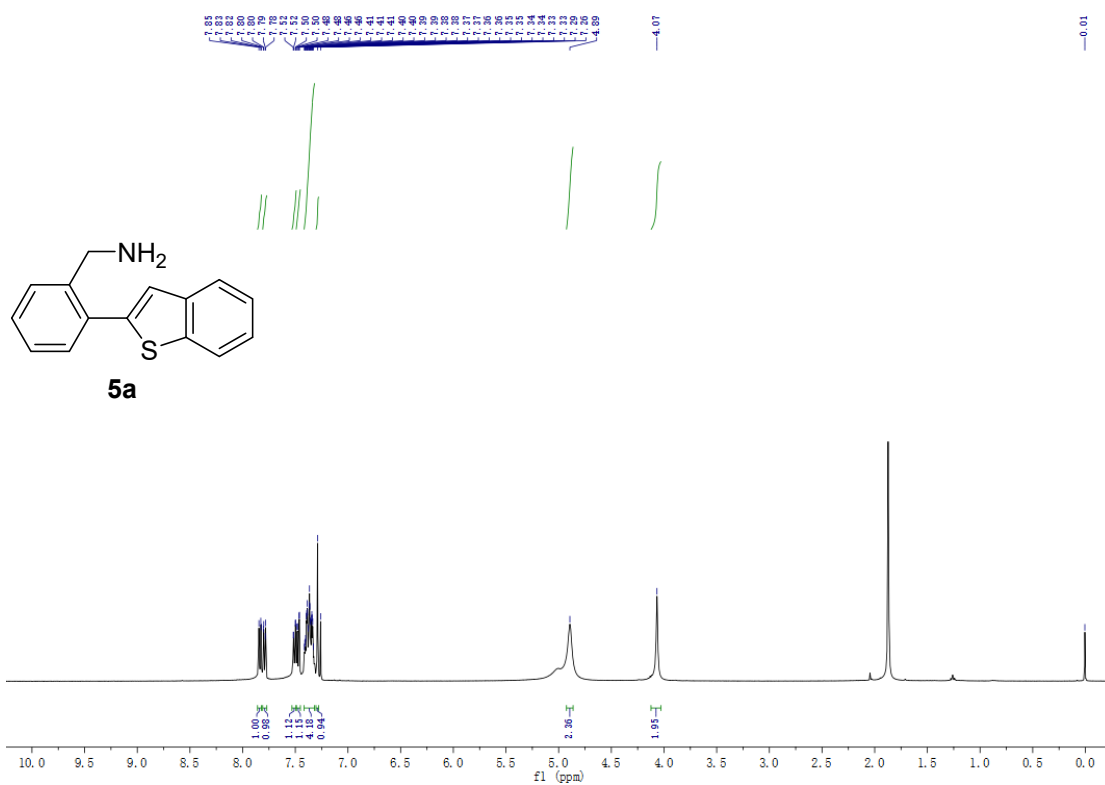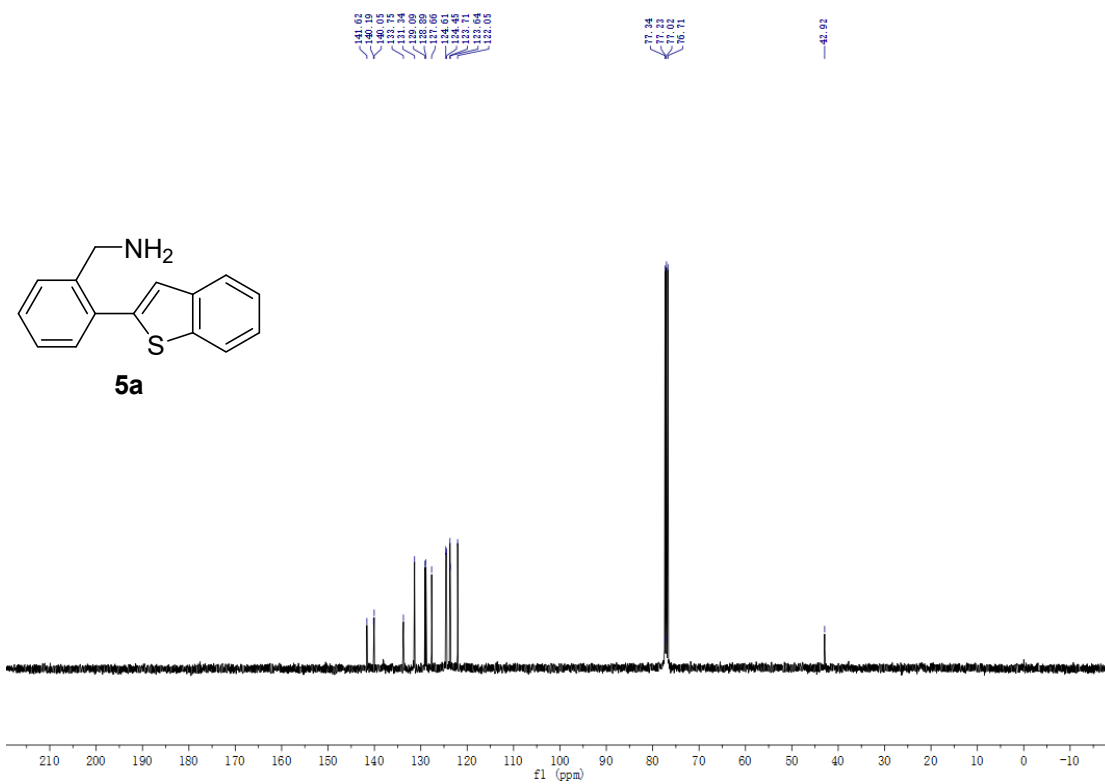

7.884  
7.883  
7.811  
7.809  
7.789  
7.782  
7.711  
7.711  
7.711  
7.677  
7.655  
7.655  
7.653  
7.651  
7.649  
7.648  
7.647  
7.646  
7.643  
7.639  
7.639  
7.637  
7.636  
7.634  
7.634  
7.628

-0.01

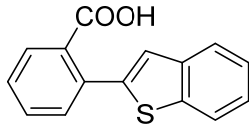

6a

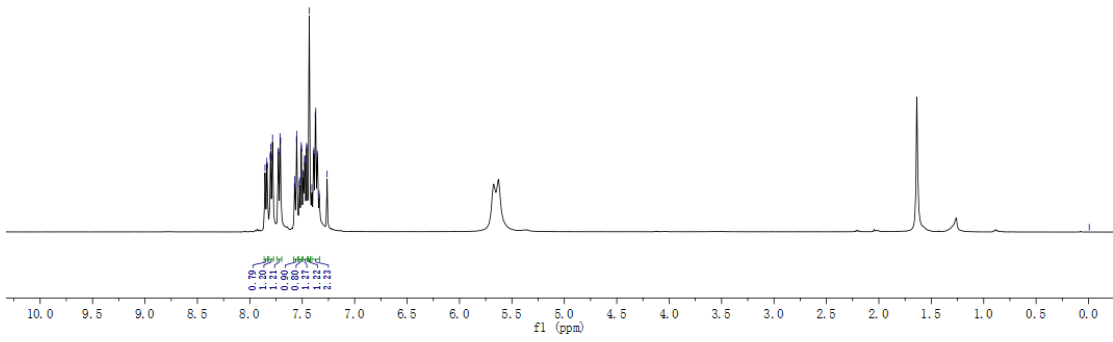

171.08  
141.06  
140.32  
140.19  
131.60  
130.91  
129.81  
129.67  
128.71  
122.89  
122.17

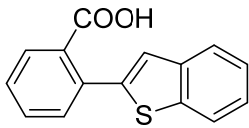

6a

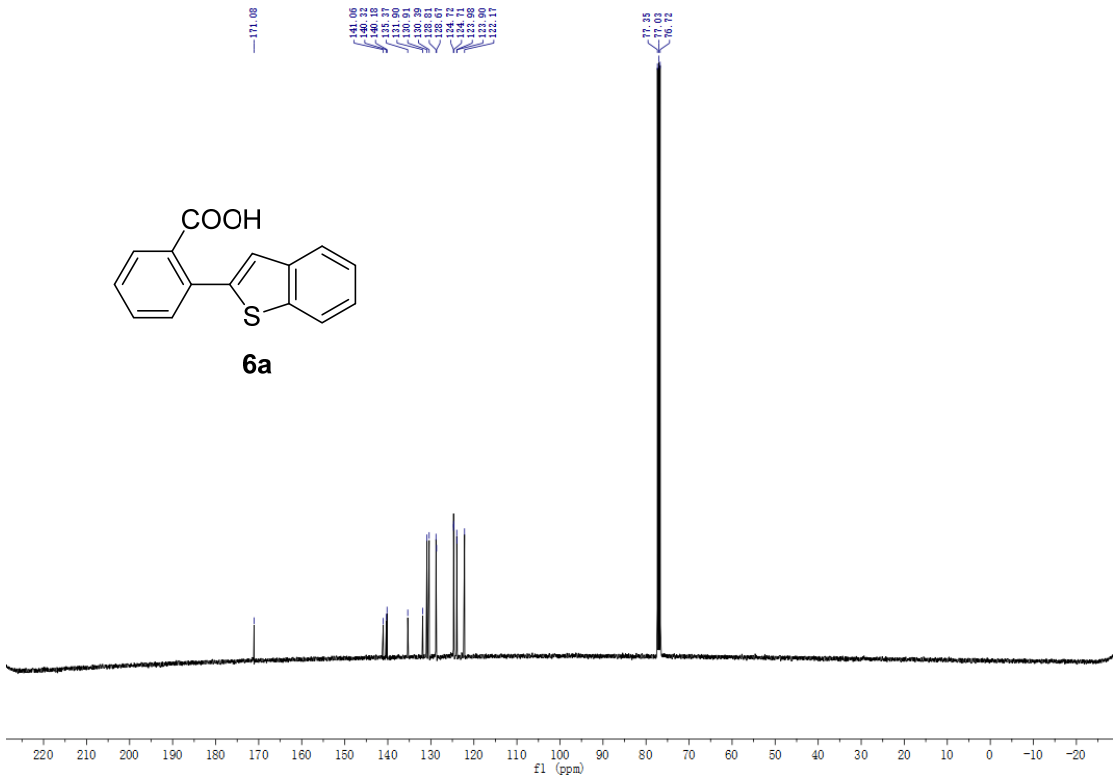



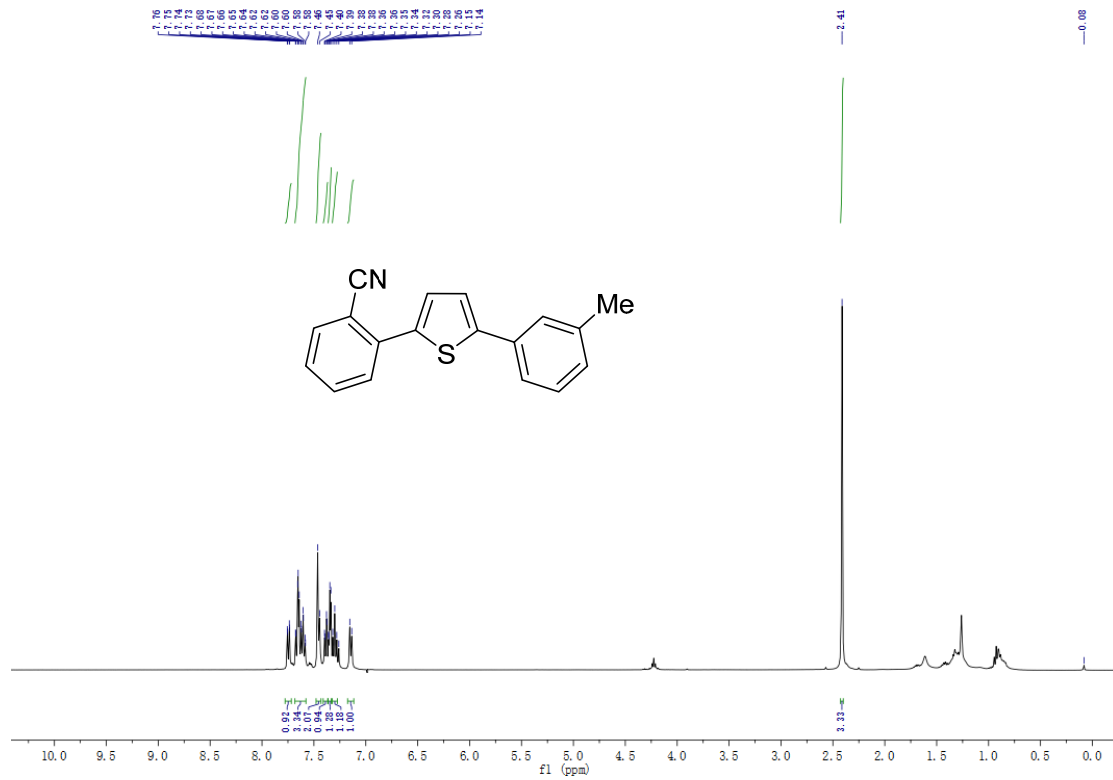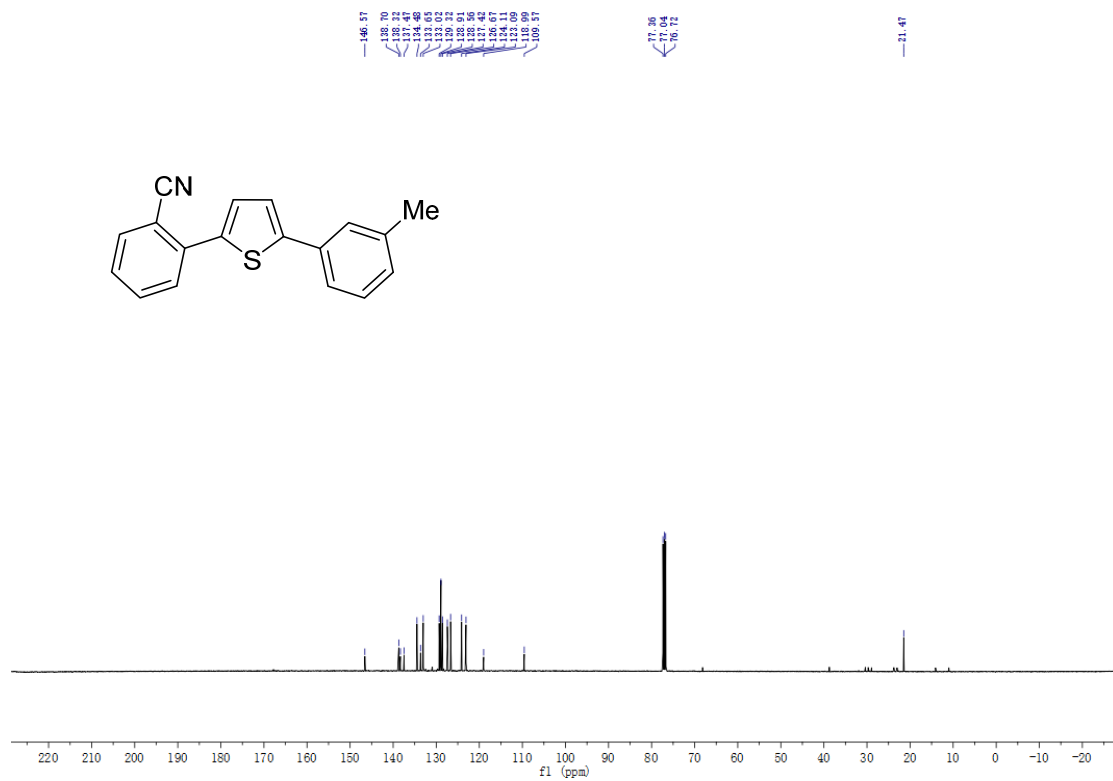

Supplement: c9qo01114e1.pdf [file c9qo01114e1.pdf]
